# Supplementary material for: How well do self-interaction corrections repair the overestimation of static polarizabilities in density functional calculations?
Source: Royal Society of Chemistry journal article supplement (doi:10.1039/d0cp06512a), 2021-01-01
Supplement: d0cp06512a1.pdf [file d0cp06512a1.pdf]

**Supplementary Material: How well do self-interaction corrections repair the overestimation of static polarizabilities in density functional calculations?**

Sharmin Akter,<sup>1</sup> Jorge A. Vargas,<sup>2</sup> Kamal Sharkas,<sup>3</sup> Juan E. Peralta,<sup>4</sup> Koblar A. Jackson,<sup>4</sup> and Tunna Baruah<sup>5</sup>

<sup>1</sup>*Computational Science Program, The University of Texas at El Paso, El Paso, Texas, 79968*

<sup>2</sup>*Unidad Académica de Física, Universidad Autónoma de Zacatecas, Calz. Solidaridad Esq. Paseo de la Bufa S N, Zacatecas, México. C.P. 98060*

<sup>3</sup>*Physics Department, Central Michigan University, Mt. Pleasant Michigan, 48859*

<sup>4</sup>*Physics Department and Science of Advanced Materials Program, Central Michigan University, Mt. Pleasant Michigan, 48859*

<sup>5</sup>*Department of Physics, The University of Texas at El Paso, El Paso, Texas, 79968*

## I. Figures and Tables

Fig. S1 shows the distribution of the relative errors in static polarizabilities computed using LSDA, SIC-LSDA and LSIC-LSDA with respect to CCSD(T) reference values.<sup>1</sup> The Gaussian curves have the same mean and standard deviation as the data. Fig. S2 and Fig. S3 show the relative errors in the static polarizabilities computed using the tested methods for the individual species of the NSP and SP subsets, respectively. Table S1 reports the effect of FOD optimization in the presence of an applied electric field on FLOSIC polarizabilities. Table S2 and S3 report the isotropic static polarizabilities (in  $\text{\AA}^3$ ) for all 132 species. Table S4 shows linear response isotropic dipole polarizabilities calculated with the PBE density functional<sup>2</sup> and different GTO basis sets<sup>3-7</sup> and with multi-wavelets, which are said to represent the infinite basis set limit.<sup>8</sup> All GTO basis linear response calculations were carried out using the Gaussian package and Cartesian GTO representation.<sup>9</sup> Table S5 shows total energies for the GTO calculations in Table S4. Table S6 compares PBE polarizabilities computed using the NRLMOL<sup>10</sup> basis set<sup>11</sup> (which uses a Cartesian form of the d-functions) and the finite field method for various values of the applied field for molecules of the NSP subset. The finite difference polarizabilities computed<sup>8</sup> with the MW basis and a field strength of 0.001 a.u. are also shown. Finally, Table S7 shows the values of PBE polarizabilities for a selection of molecules from the SP subset computed using the NRLMOL basis set and finite field strengths of 0.001 a.u. and 0.01 a.u. Hait and Head-Gordon<sup>1</sup> used 0.01 a.u. to obtain results for these molecules in their benchmark study.

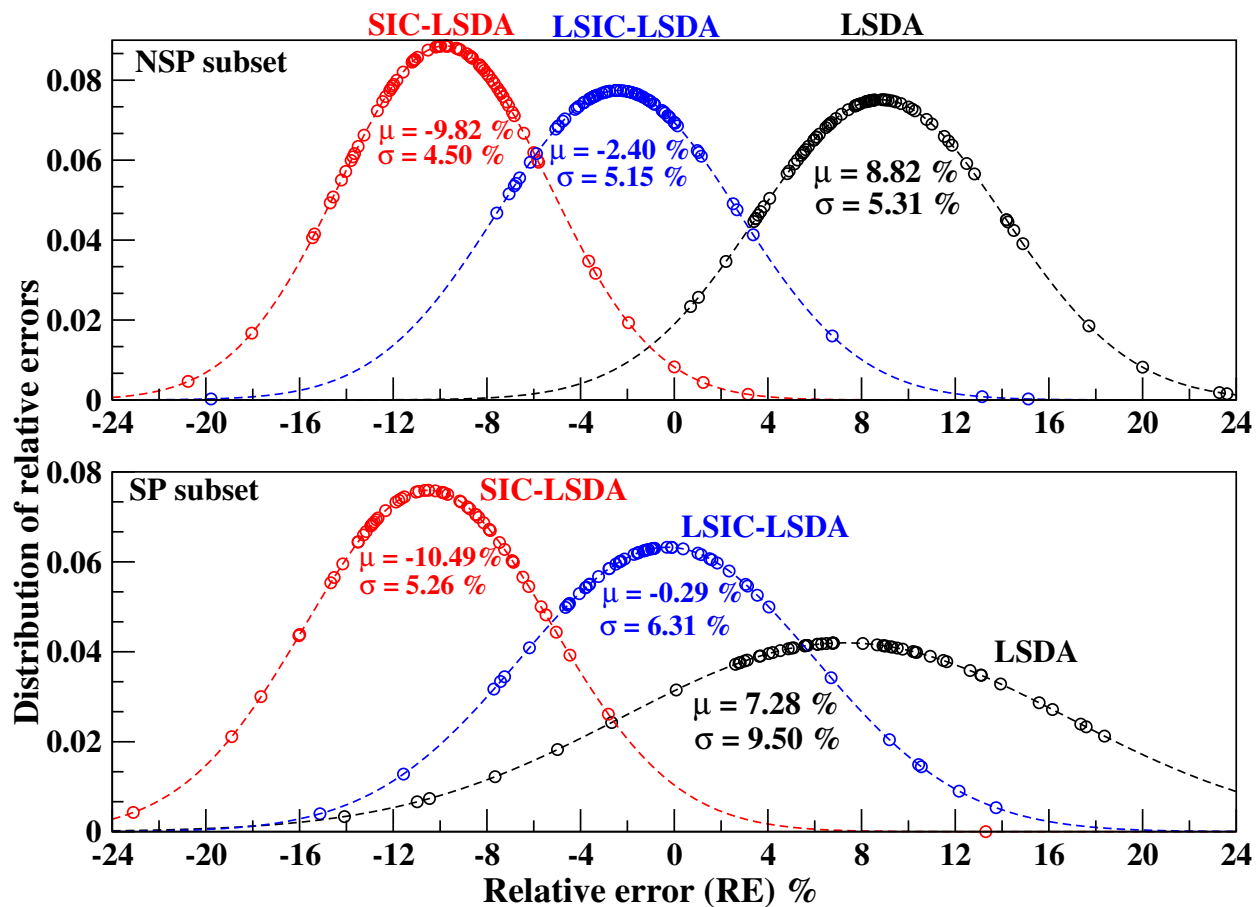

FIG. S1. Gaussian functions representing the relative errors (RE, in %) with respect to CCSD(T) for the calculated LSDA (black), SIC-LSDA (red), and LSIC-LSDA (blue) static polarizabilities of the 75 species in the NSP subset (upper panel) and the 57 species in the SP subset (lower panel). The means ( $\mu$ ) and standard deviations ( $\sigma$ ) of the Gaussians are identical to those of the respective RE distributions. The circles indicate the REs of the individual species.

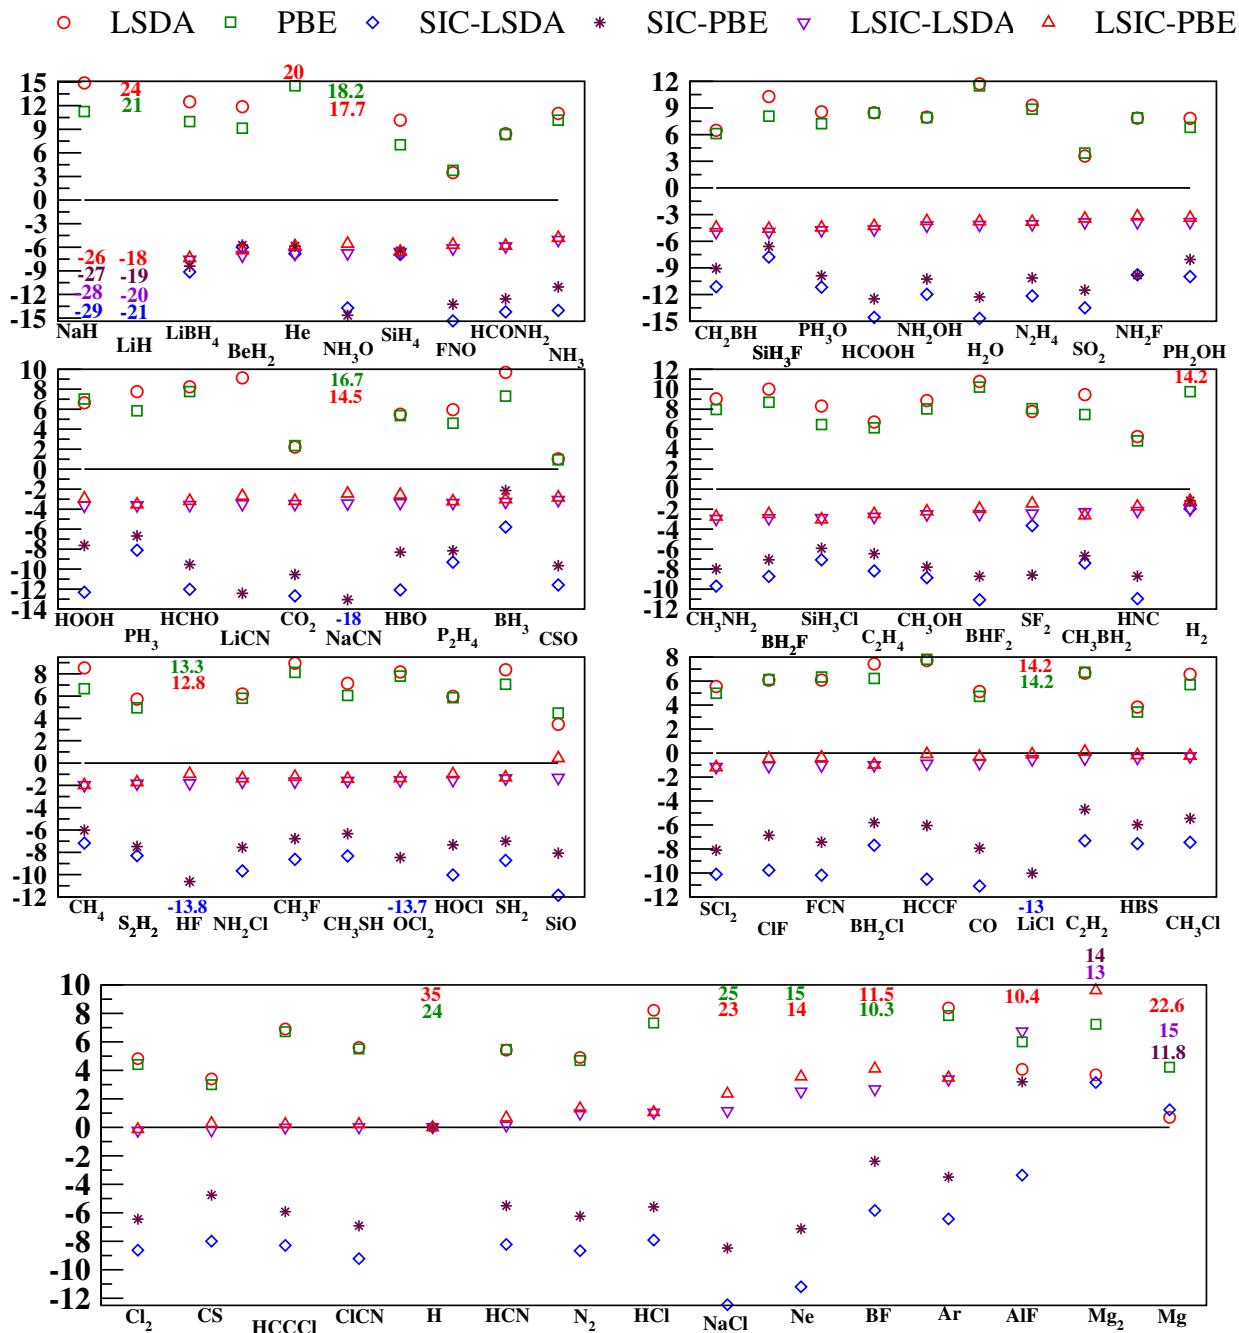

FIG. S2. The relative errors (in %) of the tested methods over the NSP subset. To avoid an expanded scale, some data points are replaced by the corresponding RE values.

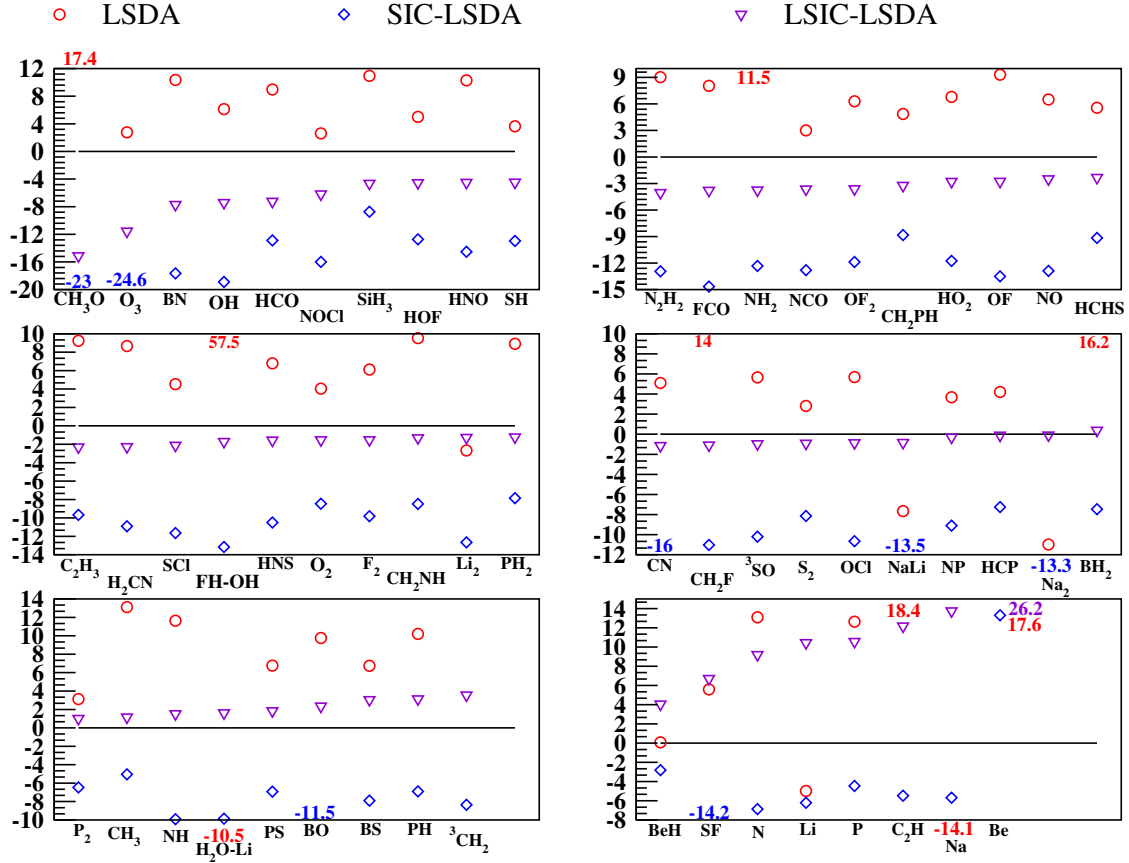

FIG. S3. The relative errors (in %) of the tested methods over the SP subset. To avoid an expanded scale, some data points are replaced by the corresponding RE values.

TABLE S1. Comparison of MAE (in  $\text{\AA}^3$ ) with respect to CCSD(T) reference values for different methods with FOD optimization (WFO) and without FOD optimization (WOFO) in the presence of the applied electric field of 0.005 a.u. N is the number of molecules used for the calculations with each method. The final row shows the MARD (mean absolute relative difference) (in %) between the WFO and WOFO polarizabilities. ( $\text{MARD} = \frac{1}{N} \sum_n^N \left| \frac{\alpha_{n,\text{WOFO}} - \alpha_{n,\text{WFO}}}{\alpha_{n,\text{WFO}}} \right| \times 100\%$ )

| Method (N) | FLO-LDA (31) | LSIC-LDA (31) | FLO-PBE (60) | LSIC-PBE (51) |
|------------|--------------|---------------|--------------|---------------|
| MAE (WOFO) | 0.446        | 0.321         | 0.364        | 0.219         |
| MAE (WFO)  | 0.380        | 0.332         | 0.303        | 0.259         |
| MARD       | 2.89         | 1.92          | 2.52         | 1.69          |

TABLE S2: Comparison of average polarizabilities (NSP subset) with CCSD(T) values taken from Ref. 1. All values in  $\text{\AA}^3$ . The field strength used in calculating the polarizabilities was set to 0.005 a.u.

| System                          | DFA-LDA | FLO-LDA | LSIC-LDA | DFA-PBE | FLO-PBE | LSIC-PBE | CCSD(T) <sup>1</sup> |
|---------------------------------|---------|---------|----------|---------|---------|----------|----------------------|
| AlF                             | 5.923   | 5.500   | 6.0751   | 6.0330  | 5.873   | 6.281    | 5.691                |
| Ar                              | 1.771   | 1.529   | 1.6891   | 1.7623  | 1.577   | 1.691    | 1.634                |
| BeH <sub>2</sub>                | 3.281   | 2.757   | 2.7262   | 3.2010  | 2.765   | 2.746    | 2.933                |
| BF                              | 3.192   | 2.695   | 2.9388   | 3.1557  | 2.794   | 2.980    | 2.862                |
| BH <sub>2</sub> Cl              | 4.684   | 4.025   | 4.3160   | 4.6312  | 4.107   | 4.318    | 4.360                |
| BH <sub>2</sub> F               | 2.695   | 2.236   | 2.3787   | 2.6629  | 2.277   | 2.389    | 2.450                |
| BH <sub>3</sub>                 | 2.764   | 2.374   | 2.4375   | 2.7043  | 2.466   | 2.444    | 2.520                |
| BHF <sub>2</sub>                | 2.642   | 2.121   | 2.3253   | 2.6283  | 2.177   | 2.338    | 2.385                |
| C <sub>2</sub> H <sub>2</sub>   | 3.561   | 3.095   | 3.3237   | 3.5637  | 3.182   | 3.343    | 3.339                |
| C <sub>2</sub> H <sub>4</sub>   | 4.276   | 3.679   | 3.8963   | 4.2530  | 3.748   | 3.907    | 4.007                |
| CH <sub>2</sub> BH              | 4.787   | 3.996   | 4.2729   | 4.7710  | 4.088   | 4.295    | 4.496                |
| CH <sub>3</sub> BH <sub>2</sub> | 4.676   | 3.956   | 4.1737   | 4.5911  | 3.987   | 4.160    | 4.272                |
| CH <sub>3</sub> Cl              | 4.707   | 4.088   | 4.4048   | 4.6691  | 4.176   | 4.407    | 4.417                |
| CH <sub>3</sub> F               | 2.653   | 2.225   | 2.3948   | 2.6330  | 2.270   | 2.405    | 2.435                |
| CH <sub>3</sub> NH <sub>2</sub> | 4.081   | 3.380   | 3.6320   | 4.0412  | 3.444   | 3.640    | 3.743                |
| CH <sub>3</sub> OH              | 3.379   | 2.829   | 3.0259   | 3.3533  | 2.862   | 3.035    | 3.104                |
| CH <sub>3</sub> SH              | 5.804   | 4.966   | 5.3312   | 5.7455  | 5.074   | 5.341    | 5.417                |
| CH <sub>4</sub>                 | 2.633   | 2.252   | 2.3780   | 2.5877  | 2.280   | 2.378    | 2.426                |
| Cl <sub>2</sub>                 | 4.719   | 4.114   | 4.4915   | 4.7006  | 4.212   | 4.496    | 4.502                |
| ClCN                            | 4.722   | 4.059   | 4.4719   | 4.7171  | 4.162   | 4.481    | 4.471                |
| ClF                             | 2.846   | 2.421   | 2.6540   | 2.8472  | 2.499   | 2.671    | 2.683                |
| CO                              | 2.029   | 1.716   | 1.9138   | 2.0211  | 1.777   | 1.924    | 1.930                |
| CO <sub>2</sub>                 | 2.636   | 2.252   | 2.4892   | 2.6396  | 2.307   | 2.497    | 2.579                |
| CS                              | 4.350   | 3.871   | 4.1989   | 4.3333  | 4.007   | 4.219    | 4.207                |
| CSO                             | 5.166   | 4.521   | 4.9551   | 5.1611  | 4.619   | 4.968    | 5.113                |

*Continued on next page*

TABLE S2 – *Continued from previous page*

| System                        | DFA-LDA | FLO-LDA | LSIC-LDA | DFA-PBE | FLO-PBE | LSIC-PBE | CCSD(T) <sup>1</sup> |
|-------------------------------|---------|---------|----------|---------|---------|----------|----------------------|
| FCN                           | 2.845   | 2.409   | 2.6545   | 2.8520  | 2.483   | 2.672    | 2.682                |
| FNO                           | 2.641   | 2.160   | 2.3951   | 2.6485  | 2.214   | 2.407    | 2.552                |
| H                             | 0.900   | 0.667   | 0.6672   | 0.8277  | 0.667   | 0.667    | 0.667                |
| H <sub>2</sub>                | 0.877   | 0.753   | 0.7527   | 0.8429  | 0.759   | 0.759    | 0.768                |
| H <sub>2</sub> O              | 1.574   | 1.202   | 1.3505   | 1.5707  | 1.236   | 1.356    | 1.409                |
| HBO                           | 2.592   | 2.160   | 2.3739   | 2.5888  | 2.253   | 2.394    | 2.457                |
| HBS                           | 5.226   | 4.653   | 5.0131   | 5.2052  | 4.732   | 5.024    | 5.033                |
| HCCCl                         | 5.743   | 4.927   | 5.3716   | 5.7329  | 5.054   | 5.384    | 5.372                |
| HCCF                          | 3.687   | 3.063   | 3.3928   | 3.6903  | 3.216   | 3.420    | 3.423                |
| HCHO                          | 2.826   | 2.297   | 2.5173   | 2.8137  | 2.362   | 2.528    | 2.611                |
| HCl                           | 2.751   | 2.341   | 2.5685   | 2.7283  | 2.400   | 2.569    | 2.542                |
| HCN                           | 2.606   | 2.269   | 2.4754   | 2.6073  | 2.336   | 2.489    | 2.472                |
| HCONH <sub>2</sub>            | 4.425   | 3.501   | 3.8409   | 4.4211  | 3.568   | 3.844    | 4.081                |
| HCOOH                         | 3.589   | 2.827   | 3.1546   | 3.5881  | 2.896   | 3.167    | 3.309                |
| He                            | 0.246   | 0.191   | 0.1910   | 0.2348  | 0.193   | 0.193    | 0.205                |
| HF                            | 0.924   | 0.706   | 0.8042   | 0.9277  | 0.732   | 0.811    | 0.819                |
| HNC                           | 2.842   | 2.404   | 2.6413   | 2.8306  | 2.465   | 2.653    | 2.700                |
| HOCl                          | 3.510   | 2.980   | 3.2618   | 3.5060  | 3.069   | 3.279    | 3.312                |
| HOOH                          | 2.363   | 1.943   | 2.1353   | 2.3716  | 2.047   | 2.151    | 2.216                |
| LiBH <sub>4</sub>             | 4.972   | 4.016   | 4.085    | 4.861   | 4.049   | 4.094    | 4.420                |
| LiCl                          | 4.387   | 3.333   | 3.822    | 4.387   | 3.457   | 3.838    | 3.842                |
| LiCN                          | 3.908   | 3.028   | 3.456    | 3.946   | 3.136   | 3.485    | 3.581                |
| LiH                           | 5.174   | 3.317   | 3.358    | 5.061   | 3.401   | 3.442    | 4.186                |
| Mg                            | 10.665  | 10.722  | 12.1925  | 11.0383 | 11.839  | 12.981   | 10.591               |
| Mg <sub>2</sub>               | 23.919  | 23.795  | 26.1018  | 24.7380 | 26.306  | 25.288   | 23.068               |
| N <sub>2</sub>                | 1.817   | 1.582   | 1.7490   | 1.8133  | 1.624   | 1.755    | 1.732                |
| N <sub>2</sub> H <sub>4</sub> | 3.643   | 2.928   | 3.1972   | 3.6281  | 2.995   | 3.206    | 3.333                |

*Continued on next page*

TABLE S2 – *Continued from previous page*

| System                        | DFA-LDA | FLO-LDA | LSIC-LDA | DFA-PBE | FLO-PBE | LSIC-PBE | CCSD(T) <sup>1</sup> |
|-------------------------------|---------|---------|----------|---------|---------|----------|----------------------|
| NaCl                          | 5.427   | 3.854   | 4.4529   | 5.5048  | 4.029   | 4.506    | 4.402                |
| NaCN                          | 4.588   | 3.284   | 3.8695   | 4.6769  | 3.484   | 3.909    | 4.007                |
| NaH                           | 7.578   | 4.702   | 4.7508   | 7.3382  | 4.814   | 4.904    | 6.596                |
| Ne                            | 0.449   | 0.349   | 0.4029   | 0.4513  | 0.365   | 0.407    | 0.393                |
| NH <sub>2</sub> Cl            | 4.199   | 3.572   | 3.8880   | 4.1837  | 3.655   | 3.900    | 3.954                |
| NH <sub>2</sub> F             | 2.361   | 1.975   | 2.1046   | 2.3616  | 1.974   | 2.119    | 2.189                |
| NH <sub>2</sub> OH            | 3.011   | 2.455   | 2.6709   | 3.0096  | 2.503   | 2.685    | 2.789                |
| NH <sub>3</sub>               | 2.310   | 1.789   | 1.9757   | 2.2924  | 1.851   | 1.981    | 2.081                |
| NH <sub>3</sub> O             | 3.543   | 2.597   | 2.8066   | 3.5574  | 2.569   | 2.843    | 3.010                |
| OCl <sub>2</sub>              | 5.974   | 4.769   | 5.4377   | 5.9535  | 5.056   | 5.448    | 5.523                |
| P <sub>2</sub> H <sub>4</sub> | 9.005   | 7.708   | 8.2118   | 8.8888  | 7.805   | 8.225    | 8.499                |
| PH <sub>2</sub> OH            | 5.275   | 4.404   | 4.7039   | 5.2251  | 4.498   | 4.728    | 4.892                |
| PH <sub>3</sub>               | 4.822   | 4.112   | 4.3133   | 4.7363  | 4.176   | 4.317    | 4.475                |
| PH <sub>3</sub> O             | 4.741   | 3.879   | 4.1592   | 4.6831  | 3.935   | 4.172    | 4.367                |
| S <sub>2</sub> H <sub>2</sub> | 6.897   | 5.982   | 6.4032   | 6.8462  | 6.035   | 6.411    | 6.523                |
| SCl <sub>2</sub>              | 7.982   | 6.799   | 7.4755   | 7.9404  | 6.951   | 7.473    | 7.563                |
| SF <sub>2</sub>               | 3.748   | 3.351   | 3.3935   | 3.7579  | 3.179   | 3.428    | 3.478                |
| SH <sub>2</sub>               | 3.887   | 3.274   | 3.5379   | 3.8404  | 3.336   | 3.541    | 3.587                |
| SiH <sub>3</sub> Cl           | 6.672   | 5.724   | 5.9822   | 6.5583  | 5.795   | 5.973    | 6.160                |
| SiH <sub>3</sub> F            | 4.537   | 3.794   | 3.9105   | 4.4459  | 3.843   | 3.925    | 4.114                |
| SiH <sub>4</sub>              | 5.055   | 4.272   | 4.2860   | 4.9121  | 4.294   | 4.287    | 4.589                |
| SiO                           | 4.524   | 3.854   | 4.3145   | 4.5682  | 4.019   | 4.391    | 4.372                |
| SO <sub>2</sub>               | 3.899   | 3.256   | 3.6183   | 3.9112  | 3.331   | 3.634    | 3.764                |



TABLE S3: Comparison of average polarizabilities (SP subset) with CCSD(T) polarizabilities taken from Ref. 1. All values in  $\text{\AA}^3$ . The applied field strength used for these calculations was set to 0.01 a.u. except for the **bold faced** species, for which the field strength was set to 0.001 a.u.

| System                        | DFA    | FLOSIC | LSIC   | CCSD(T) <sup>1</sup> | System                | DFA    | FLOSIC | LSIC   | CCSD(T) <sup>1</sup> |
|-------------------------------|--------|--------|--------|----------------------|-----------------------|--------|--------|--------|----------------------|
| Be                            | 6.611  | 6.370  | 7.096  | 5.622                | Na                    | 20.895 | 22.937 | 27.662 | 24.320               |
| BeH                           | 4.876  | 4.735  | 5.069  | 4.872                | <b>Na<sub>2</sub></b> | 34.416 | 33.530 | 38.624 | 38.661               |
| BH <sub>2</sub>               | 3.394  | 2.704  | 2.933  | 2.922                | <b>NaLi</b>           | 32.436 | 30.385 | 34.831 | 35.124               |
| BN                            | 3.839  | 2.865  | 3.211  | 3.479                | NH                    | 1.621  | 1.308  | 1.474  | 1.452                |
| BO                            | 2.667  | 2.150  | 2.487  | 2.430                | NH <sub>2</sub>       | 1.989  | 1.564  | 1.717  | 1.784                |
| BS                            | 5.323  | 4.593  | 5.139  | 4.987                | NO                    | 1.835  | 1.501  | 1.680  | 1.723                |
| C <sub>2</sub> H              | 3.911  | 3.123  | 3.706  | 3.304                | NOCl                  | 5.177  | 4.238  | 4.733  | 5.045                |
| C <sub>2</sub> H <sub>3</sub> | 4.211  | 3.482  | 3.766  | 3.855                | NP                    | 4.305  | 3.774  | 4.139  | 4.152                |
| CH <sub>2</sub> F             | 2.698  | 2.107  | 2.342  | 2.368                | O <sub>2</sub>        | 1.624  | 1.429  | 1.537  | 1.561                |
| CH <sub>2</sub> NH            | 3.565  | 2.979  | 3.212  | 3.255                | O <sub>3</sub>        | 2.897  | 2.124  | 2.493  | 2.819                |
| CH <sub>2</sub> PH            | 6.355  | 5.525  | 5.864  | 6.060                | OCl                   | 3.175  | 2.684  | 2.978  | 3.004                |
| CH <sub>2</sub> -t            | 2.477  | 1.964  | 2.219  | 2.143                | OF                    | 1.538  | 1.217  | 1.368  | 1.407                |
| CH <sub>3</sub> O             | 4.049  | 2.653  | 2.928  | 3.450                | OF <sub>2</sub>       | 2.263  | 1.876  | 2.052  | 2.129                |
| F <sub>2</sub>                | 1.320  | 1.122  | 1.225  | 1.244                | OH                    | 1.230  | 0.940  | 1.073  | 1.159                |
| FH-OH                         | 3.028  | 1.670  | 1.890  | 1.923                | P                     | 4.173  | 3.540  | 4.096  | 3.705                |
| H <sub>2</sub> CN             | 3.148  | 2.581  | 2.831  | 2.897                | PH                    | 4.473  | 3.779  | 4.186  | 4.059                |
| <b>H<sub>2</sub>O-Li</b>      | 34.561 | 34.788 | 39.216 | 38.594               | PH <sub>2</sub>       | 4.715  | 3.989  | 4.276  | 4.329                |
| HCHS                          | 5.326  | 4.583  | 4.927  | 5.045                | S <sub>2</sub>        | 6.169  | 5.512  | 5.945  | 6.000                |
| HCO                           | 2.708  | 2.165  | 2.305  | 2.485                | SCl                   | 5.566  | 4.705  | 5.212  | 5.325                |
| HCP                           | 5.479  | 4.877  | 5.252  | 5.258                | SF                    | 3.514  | 2.857  | 3.551  | 3.328                |
| HNO                           | 2.445  | 1.895  | 2.117  | 2.217                | SH                    | 3.567  | 2.996  | 3.288  | 3.442                |
| HNS                           | 4.621  | 3.873  | 4.259  | 4.327                | SO-trip               | 3.605  | 3.064  | 3.379  | 3.412                |
| HO <sub>2</sub>               | 2.106  | 1.740  | 1.917  | 1.972                | CN                    | 3.010  | 2.405  | 2.831  | 2.864                |
| HOF                           | 1.824  | 1.516  | 1.658  | 1.737                | P <sub>2</sub>        | 7.563  | 6.860  | 7.408  | 7.334                |
| Li                            | 23.092 | 22.794 | 26.840 | 24.304               | PS                    | 6.974  | 6.080  | 6.652  | 6.532                |

*Continued on next page*

TABLE S3 – *Continued from previous page*

|                               |        |        |        |        |                  |       |       |       |       |
|-------------------------------|--------|--------|--------|--------|------------------|-------|-------|-------|-------|
| Li <sub>2</sub>               | 30.105 | 27.019 | 30.537 | 30.932 | CH <sub>3</sub>  | 2.648 | 2.223 | 2.368 | 2.341 |
| N                             | 1.218  | 1.003  | 1.176  | 1.077  | NCO              | 3.225 | 2.730 | 3.017 | 3.131 |
| N <sub>2</sub> H <sub>2</sub> | 3.067  | 2.449  | 2.699  | 2.813  | FCO              | 2.792 | 2.205 | 2.486 | 2.584 |
|                               |        |        |        |        | SiH <sub>3</sub> | 5.549 | 4.565 | 4.770 | 5.002 |

TABLE S4: Comparison of PBE linear-response polarizabilities (in Å<sup>3</sup>) using different basis sets. Polarizabilities were computed using GAUSSIAN<sup>9</sup> for consistency, using Cartesian forms of the basis sets. The rightmost column indicates the multi-wavelet (MW) reference results taken from Ref. 8

|                 | NRLMOL | aug-cc-pVDZ | aug-cc-pVTZ | aug-cc-pVQZ | aug-cc-pV5Z | MW      |         |
|-----------------|--------|-------------|-------------|-------------|-------------|---------|---------|
| BeH             |        | 5.2174      | 5.1072      | 5.1799      | 5.2008      | 5.2142  | N.A.    |
| CO              |        | 2.0186      | 1.9853      | 2.0152      | 2.0204      | 2.0215  | N.A.    |
| FH-OH           |        | 2.52803     | 2.36340     | 2.43922     | 2.47716     | 2.48510 | N.A.    |
| HO <sub>2</sub> |        | 2.1112      | 1.9648      | 2.0568      | 2.0907      | 2.1002  | N. A.   |
| Li              |        | 20.9604     | 20.9710     | 21.0494     | 21.0741     | 21.0562 | N.A.    |
| NaCl            |        | 5.4583      | 5.2002      | 5.4212      | 5.4676      | 5.4673  | N.A.    |
| NaCN            |        | 4.6448      | 4.6339      | 4.6410      | 4.6492      | 4.6513  | N.A.    |
| Li <sub>2</sub> |        | 29.9385     | 29.9382     | 29.9927     | 29.9661     | 29.9613 | 29.9608 |
| NaLi            |        | 32.8369     | 33.0903     | 33.0108     | 32.9274     | 32.8952 | 32.8879 |
| CO <sub>2</sub> |        | 2.6392      | 2.5508      | 2.6119      | 2.6327      | 2.6382  | 2.6411  |
| F <sub>2</sub>  |        | 1.3278      | 1.1548      | 1.2538      | 1.3043      | 1.3176  | 1.3282  |
| H <sub>2</sub>  |        | 0.8422      | 0.8062      | 0.8391      | 0.8414      | 0.8419  | 0.8422  |
| HBO             |        | 2.5910      | 2.5611      | 2.5873      | 2.5910      | 2.5926  | 2.5931  |
| HCN             |        | 2.6057      | 2.5522      | 2.5971      | 2.6056      | 2.6070  | 2.6080  |
| He              |        | 0.2347      | 0.2185      | 0.2275      | 0.2323      | 0.2339  | 0.2348  |
| HF              |        | 0.9262      | 0.8012      | 0.8743      | 0.9063      | 0.9163  | 0.9269  |
| LiH             |        | 4.9762      | 5.0727      | 4.9590      | 4.9627      | 4.9623  | 4.9626  |
| NaH             |        | 7.2067      | 7.3864      | 7.2979      | 7.2480      | 7.2107  | 7.1908  |

*Continued on next page*

TABLE S4 – *Continued from previous page*

|                   | NRLMOL  | aug-cc-pVDZ | aug-cc-pVTZ | aug-cc-pVQZ | aug-cc-pV5Z | MW      |
|-------------------|---------|-------------|-------------|-------------|-------------|---------|
| Mg                | 10.9422 | 10.8876     | 10.9498     | 10.9492     | 10.9625     | 10.9661 |
| Ne                | 0.4553  | 0.3176      | 0.3897      | 0.4310      | 0.4459      | 0.4557  |
| NH <sub>3</sub>   | 2.2879  | 2.1983      | 2.2609      | 2.2738      | 2.2810      | 2.2863  |
| SiH <sub>4</sub>  | 4.9074  | 4.8897      | 4.9116      | 4.9067      | 4.9052      | 4.9051  |
| RMS(15) w.r.t MW  | 0.0161  | 0.1078      | 0.0515      | 0.0209      | 0.0072      | –       |
| RMS%(15) w.r.t MW | 0.1309  | 9.3156      | 4.2478      | 1.5756      | 0.6576      | –       |

TABLE S5: Comparison of PBE total energies (in Hartree) calculated with different basis sets. The last row shows the RMS difference with respect to the aug-cc-pV5Z basis. All energies were computed using GAUSSIAN<sup>9</sup> for consistency, using Cartesian forms of the basis sets.

| Basis set       | NRLMOL       | aug-cc-pVDZ  | aug-cc-pVTZ  | aug-cc-pVQZ  | aug-cc-pV5Z  |
|-----------------|--------------|--------------|--------------|--------------|--------------|
| BeH             | -15.2160099  | -15.2147543  | -15.2174880  | -15.2183178  | -15.2184426  |
| CO              | -113.2389527 | -113.2061407 | -113.2329857 | -113.2408256 | -113.2423520 |
| FH-OH           | -176.1009653 | -176.0408629 | -176.0871418 | -176.1003922 | -176.1026061 |
| HO <sub>2</sub> | -150.8372576 | -150.7924741 | -150.8282489 | -150.8388051 | -150.8411675 |
| Li              | -7.4621449   | -7.4612451   | -7.4618459   | -7.4620734   | -7.4621468   |
| NaCl            | -622.2930510 | -622.2644418 | -622.2829758 | -622.2925230 | -622.2951239 |
| NaCN            | -254.9676515 | -254.9321695 | -254.9589637 | -254.9683910 | -254.9689245 |
| Li <sub>2</sub> | -14.9559008  | -14.9539604  | -14.9553963  | -14.9558966  | -14.9559951  |
| NaLi            | -169.6620224 | -169.6512753 | -169.6582199 | -169.6615944 | -169.6629834 |
| CO <sub>2</sub> | -188.4852422 | -188.4295512 | -188.4765437 | -188.4894595 | -188.4919672 |
| F <sub>2</sub>  | -199.4328979 | -199.3639881 | -199.4182097 | -199.4328730 | -199.4362266 |
| H <sub>2</sub>  | -1.1665090   | -1.1604473   | -1.1661120   | -1.1665636   | -1.1666824   |
| HBO             | -100.6347928 | -100.6018480 | -100.6282350 | -100.6357165 | -100.6370742 |
| HCN             | -93.3518630  | -93.3242421  | -93.3479630  | -93.3535405  | -93.3545789  |
| He              | -2.8928768   | -2.8869533   | -2.8924351   | -2.8927834   | -2.8928871   |

*Continued on next page*

TABLE S5 – *Continued from previous page*

| Basis set        | NRLMOL       | aug-cc-pVDZ  | aug-cc-pVTZ  | aug-cc-pVQZ  | aug-cc-pV5Z  |
|------------------|--------------|--------------|--------------|--------------|--------------|
| HF               | -100.4012733 | -100.3646301 | -100.3926066 | -100.4005353 | -100.4022872 |
| LiH              | -8.0470373   | -8.0432914   | -8.0467243   | -8.0472143   | -8.0473177   |
| NaH              | -162.7385017 | -162.7264028 | -162.7338411 | -162.7376816 | -162.7394621 |
| Mg               | -199.9530556 | -199.9439553 | -199.9493939 | -199.9533960 | -199.9543803 |
| Ne               | -128.8659964 | -128.8158617 | -128.8526684 | -128.8638552 | -128.8661349 |
| NH <sub>3</sub>  | -56.5160773  | -56.4950744  | -56.5123715  | -56.5163545  | -56.5171480  |
| SiH <sub>4</sub> | -291.7304577 | -291.7071179 | -291.7239596 | -291.7311326 | -291.7325852 |
| RMS(22) w.r.t 5Z | 0.00234      | 0.03482      | 0.00924      | 0.00162      | –            |

TABLE S6: Comparison of PBE polarizabilities (in  $\text{\AA}^3$ ) computed using the NRLMOL basis and the finite-field method for different field strengths,  $F = 0.001, 0.005,$  and  $0.01$  with corresponding values computed<sup>8</sup> with MW (multi-wavelet) basis sets. In the last row, RMSRE(%) is the root mean square relative difference with respect to NRLMOL-PBE ( $F = 0.001$ ). The comparison of NRLMOL-PBE ( $F = 0.001$ ) and the MW ( $F = 0.001$ ) in the last row gives another indication of the quality of the NRLMOL basis relative to the basis-set-limit MW basis.

| Code                          | NRLMOL | NRLMOL | NRLMOL | MW    |
|-------------------------------|--------|--------|--------|-------|
| Electric field                | 0.001  | 0.005  | 0.01   | 0.001 |
| AlF                           | 6.013  | 6.033  | 6.099  | 6.038 |
| Ar                            | 1.762  | 1.762  | 1.765  | 1.769 |
| BeH <sub>2</sub>              | 3.196  | 3.201  | 3.215  | 3.196 |
| BF                            | 3.149  | 3.156  | 3.178  | 3.157 |
| BH <sub>2</sub> Cl            | 4.626  | 4.631  | 4.632  | 4.637 |
| BH <sub>2</sub> F             | 2.661  | 2.663  | 2.670  | 2.662 |
| BH <sub>3</sub>               | 2.699  | 2.704  | 2.714  | 2.702 |
| BHF <sub>2</sub>              | 2.627  | 2.628  | 2.634  | 2.628 |
| C <sub>2</sub> H <sub>2</sub> | 3.557  | 3.564  | 3.577  | 3.558 |

*Continued on next page*

TABLE S6 – *Continued from previous page*

| Code                            | NRLMOL | NRLMOL | NRLMOL | MW    |
|---------------------------------|--------|--------|--------|-------|
| Electric field                  | 0.001  | 0.005  | 0.01   | 0.001 |
| C <sub>2</sub> H <sub>4</sub>   | 4.249  | 4.253  | 4.270  | 4.247 |
| CH <sub>2</sub> BH              | 4.746  | 4.771  | 4.799  | 4.761 |
| CH <sub>3</sub> BH <sub>2</sub> | 4.586  | 4.591  | 4.610  | 4.587 |
| CH <sub>3</sub> Cl              | 4.663  | 4.669  | 4.682  | 4.676 |
| CH <sub>3</sub> F               | 2.631  | 2.633  | 2.639  | 2.632 |
| CH <sub>3</sub> NH <sub>2</sub> | 4.036  | 4.041  | 4.063  | 4.035 |
| CH <sub>3</sub> OH              | 3.350  | 3.353  | 3.364  | 3.349 |
| CH <sub>3</sub> SH              | 5.736  | 5.746  | 5.777  | 5.742 |
| CH <sub>4</sub>                 | 2.584  | 2.588  | 2.595  | 2.585 |
| Cl <sub>2</sub>                 | 4.689  | 4.701  | 4.712  | 4.72  |
| ClCN                            | 4.714  | 4.717  | 4.727  | 4.733 |
| ClF                             | 2.845  | 2.847  | 2.854  | 2.855 |
| CO                              | 2.020  | 2.021  | 2.025  | 2.022 |
| CO <sub>2</sub>                 | 2.638  | 2.64   | 2.642  | 2.641 |
| CS                              | 4.327  | 4.333  | 4.350  | 4.344 |
| CSO                             | 5.159  | 5.161  | 5.175  | 5.17  |
| FCN                             | 2.850  | 2.852  | 2.856  | 2.853 |
| FNO                             | 2.647  | 2.649  | 2.654  | 2.649 |
| H                               | 0.826  | 0.828  | 0.834  | 0.825 |
| H <sub>2</sub>                  | 0.842  | 0.843  | 0.845  | 0.843 |
| H <sub>2</sub> O                | 1.569  | 1.571  | 1.577  | 1.569 |
| HBO                             | 2.567  | 2.589  | 2.593  | 2.593 |
| HBS                             | 5.185  | 5.205  | 5.223  | 5.208 |
| HCCCl                           | 5.727  | 5.733  | 5.752  | 5.749 |
| HCCF                            | 3.695  | 3.69   | 3.709  | 3.695 |
| HCHO                            | 2.810  | 2.814  | 2.826  | 2.811 |

*Continued on next page*

TABLE S6 – *Continued from previous page*

| Code                          | NRLMOL | NRLMOL | NRLMOL | MW     |
|-------------------------------|--------|--------|--------|--------|
| Electric field                | 0.001  | 0.005  | 0.01   | 0.001  |
| HCl                           | 2.722  | 2.728  | 2.737  | 2.73   |
| HCN                           | 2.603  | 2.607  | 2.613  | 2.608  |
| HCONH <sub>2</sub>            | 4.411  | 4.421  | 4.456  | 4.409  |
| HCOOH                         | 3.583  | 3.588  | 3.604  | 3.583  |
| He                            | 0.234  | 0.235  | 0.235  | 0.235  |
| HF                            | 0.919  | 0.928  | 0.928  | 0.927  |
| HNC                           | 2.827  | 2.831  | 2.843  | 2.83   |
| HOCl                          | 3.503  | 3.506  | 3.516  | 3.514  |
| HOOH                          | 2.370  | 2.372  | 2.378  | 2.37   |
| LiBH <sub>4</sub>             | 4.848  | 4.86   | 4.899  | 4.848  |
| LiCl                          | 4.343  | 4.403  | 4.454  | 4.385  |
| LiCN                          | 3.931  | 3.946  | 4.002  | 3.935  |
| LiH                           | 4.968  | 5.072  | 5.402  | 4.966  |
| Mg                            | 10.950 | 11.038 | 11.397 | 10.97  |
| Mg <sub>2</sub>               | 24.432 | 24.738 | 26.606 | 24.488 |
| N <sub>2</sub>                | 1.812  | 1.813  | 1.816  | 1.815  |
| N <sub>2</sub> H <sub>4</sub> | 3.622  | 3.628  | 3.653  | 3.621  |
| NaCl                          | 5.463  | 5.505  | 5.674  | 5.472  |
| NaCN                          | 4.645  | 4.677  | 4.798  | 4.655  |
| NaH                           | 7.212  | 7.338  | 7.911  | 7.196  |
| Ne                            | 0.452  | 0.451  | 0.451  | 0.456  |
| NH <sub>2</sub> Cl            | 4.179  | 4.184  | 4.200  | 4.19   |
| NH <sub>2</sub> F             | 2.359  | 2.362  | 2.371  | 2.36   |
| NH <sub>2</sub> OH            | 3.005  | 3.01   | 3.023  | 3.005  |
| NH <sub>3</sub>               | 2.313  | 2.292  | 2.307  | 2.286  |
| NH <sub>3</sub> O             | 3.544  | 3.557  | 3.595  | 3.54   |

*Continued on next page*

TABLE S6 – *Continued from previous page*

| Code                          | NRLMOL | NRLMOL | NRLMOL | MW    |
|-------------------------------|--------|--------|--------|-------|
| Electric field                | 0.001  | 0.005  | 0.01   | 0.001 |
| OCl <sub>2</sub>              | 5.944  | 5.9535 | 5.980  | 5.962 |
| P <sub>2</sub> H <sub>4</sub> | 8.870  | 8.8888 | 8.948  | 8.878 |
| PH <sub>2</sub> OH            | 5.215  | 5.2251 | 5.259  | 5.216 |
| PH <sub>3</sub>               | 4.729  | 4.7363 | 4.761  | 4.726 |
| PH <sub>3</sub> O             | 4.678  | 4.6831 | 4.700  | 4.661 |
| S <sub>2</sub> H <sub>2</sub> | 6.836  | 6.8462 | 6.880  | 6.851 |
| SCl <sub>2</sub>              | 7.933  | 7.9404 | 7.968  | 7.96  |
| SF <sub>2</sub>               | 3.753  | 3.7579 | 3.775  | 3.766 |
| SH <sub>2</sub>               | 3.834  | 3.8404 | 3.862  | 3.834 |
| SiH <sub>3</sub> Cl           | 6.522  | 6.5583 | 6.579  | 6.558 |
| SiH <sub>3</sub> F            | 4.440  | 4.4459 | 4.460  | 4.44  |
| SiH <sub>4</sub>              | 4.905  | 4.9121 | 4.931  | 4.905 |
| SiO                           | 4.566  | 4.5682 | 4.588  | 4.574 |
| SO <sub>2</sub>               | 3.912  | 3.9112 | 3.921  | 3.9   |
| RMSRE (%)                     | –      | 0.48   | 2.09   | 0.22  |

TABLE S7: Comparison of PBE polarizabilities (in  $\text{\AA}^3$ ) computed using the NRLMOL basis and the finite-field method for different field strengths  $F = 0.001$  and  $0.01$  a.u.. In the last row, MARE (%) is the mean absolute relative difference (in %) with respect to NRLMOL-PBE ( $F = 0.001$  a.u.).

| Electric field | 0.001 | 0.01  |
|----------------|-------|-------|
| BeH            | 5.219 | 5.387 |
| BS             | 5.255 | 5.278 |
| F <sub>2</sub> | 1.328 | 1.329 |
| FCO            | 2.783 | 2.797 |

*Continued on next page*

TABLE S7 – *Continued from previous page*

| Electric field  | 0.001 | 0.01  |
|-----------------|-------|-------|
| FH-OH           | 2.542 | 2.685 |
| HCO             | 2.676 | 2.711 |
| HCP             | 5.447 | 5.478 |
| HNO             | 2.429 | 2.447 |
| HNS             | 4.578 | 4.615 |
| HO <sub>2</sub> | 2.111 | 2.119 |
| HOF             | 1.829 | 1.833 |
| NCO             | 3.201 | 3.207 |
| NH              | 1.600 | 1.609 |
| OF              | 1.574 | 1.509 |
| OH              | 1.330 | 1.335 |
| MARE (%)        | –     | 1.28  |

## References

- <sup>1</sup>D. Hait and M. Head-Gordon, *Phys. Chem. Chem. Phys.* **20**, 19800 (2018).
- <sup>2</sup>J. P. Perdew, K. Burke, and M. Ernzerhof, *Phys. Rev. Lett.* **77**, 3865 (1996).
- <sup>3</sup>T. H. Dunning, *J. Chem. Phys.* **90**, 1007 (1989).
- <sup>4</sup>R. A. Kendall, T. H. Dunning, and R. J. Harrison, *J. Chem. Phys.* **96**, 6796 (1992).
- <sup>5</sup>B. P. Pritchard, D. Altarawy, B. Didier, T. D. Gibbsom, and T. L. Windus, *J. Chem. Inf. Model.* **59**, 4814 (2019).
- <sup>6</sup>D. Feller, *J. Comput. Chem.* **17**, 1571 (1996).
- <sup>7</sup>K. L. Schuchardt, B. T. Didier, T. Elsethagen, L. Sun, V. Gurumoorthi, J. Chase, J. Li, and T. L. Windus, *J. Chem. Inf. Model.* **47**, 1045 (2007).
- <sup>8</sup>A. Brakestad, S. R. Jensen, P. Wind, M. D’Alessandro, L. Genovese, K. H. Hopmann, and L. Frediani, *J. Chem. Theory Comput.* **16**, 4874 (2020).



<sup>9</sup>M. J. Frisch, G. W. Trucks, H. B. Schlegel, G. E. Scuseria, M. A. Robb, J. R. Cheeseman, G. Scalmani, V. Barone, G. A. Petersson, H. Nakatsuji, X. Li, M. Caricato, A. V. Marenich, J. Bloino, B. G. Janesko, R. Gomperts, B. Mennucci, H. P. Hratchian, J. V. Ortiz, A. F. Izmaylov, J. L. Sonnenberg, D. Williams-Young, F. Ding, F. Lipparini, F. Egidi, J. Goings, B. Peng, A. Petrone, T. Henderson, D. Ranasinghe, V. G. Zakrzewski, J. Gao, N. Rega, G. Zheng, W. Liang, M. Hada, M. Ehara, K. Toyota, R. Fukuda, J. Hasegawa, M. Ishida, T. Nakajima, Y. Honda, O. Kitao, H. Nakai, T. Vreven, K. Throssell, J. A. Montgomery, Jr., J. E. Peralta, F. Ogliaro, M. J. Bearpark, J. J. Heyd, E. N. Brothers, K. N. Kudin, V. N. Staroverov, T. A. Keith, R. Kobayashi, J. Normand, K. Raghavachari, A. P. Rendell, J. C. Burant, S. S. Iyengar, J. Tomasi, M. Cossi, J. M. Millam, M. Klene, C. Adamo, R. Cammi, J. W. Ochterski, R. L. Martin, K. Morokuma, O. Farkas, J. B. Foresman, and D. J. Fox, “Gaussian 16 Revision B.01,” (2016), gaussian Inc. Wallingford CT.

<sup>10</sup>M. Pederson, D. Porezag, J. Kortus, and D. Patton, *phys. stat. sol. (b)* **217**, 197 (2000).

<sup>11</sup>D. Porezag and M. R. Pederson, *Phys. Rev. A* **60**, 2840 (1999).

# Basis in Gaussian Format

August 9, 2021

## 1 Introduction

```
! Augmented NRLMOL basis for
! H He Li Be B C N O F Ne Na Mg Si P S Cl
! cite as:
! D. Porezag and M. R. Pederson, Phys. Rev. A, 1999, 60, 2840-2847.
!
!ATTENTION ATTENTION ATTENTION ATTENTION ATTENTION ATTENTION ATTENTION
!ATTENTION ATTENTION ATTENTION ATTENTION ATTENTION ATTENTION ATTENTION
!ATTENTION ATTENTION ATTENTION ATTENTION ATTENTION ATTENTION ATTENTION
!
!       To use in Gaussian it is necessary to include the keyword
!                   iop(3/92=201)
!
!ATTENTION ATTENTION ATTENTION ATTENTION ATTENTION ATTENTION ATTENTION
!ATTENTION ATTENTION ATTENTION ATTENTION ATTENTION ATTENTION ATTENTION
!ATTENTION ATTENTION ATTENTION ATTENTION ATTENTION ATTENTION ATTENTION
!
-C 0
S 12 1.000
0.2221336090E+05      0.1979224900E+00
0.3331736980E+04      0.3699897740E+00
0.7579013460E+03      0.6364461530E+00
0.2145437190E+03      0.1012493110E+01
0.6992488940E+02      0.1448078710E+01
0.2508613490E+02      0.1717368870E+01
0.9591041750E+01      0.1493193200E+01
0.3802455710E+01      0.6898716060E+00
0.1489185420E+01      0.8607224650E-01
0.5748765300E+00      -0.1656669520E-02
0.2149473200E+00      0.3776603340E-03
0.7720965000E-01      -0.4710534310E-04
S 12 1.000
0.2221336090E+05      -0.4500525960E-01
```

|                  |                   |
|------------------|-------------------|
| 0.3331736980E+04 | -0.8462105180E-01 |
| 0.7579013460E+03 | -0.1449656410E+00 |
| 0.2145437190E+03 | -0.2353560110E+00 |
| 0.6992488940E+02 | -0.3421536850E+00 |
| 0.2508613490E+02 | -0.4459512370E+00 |
| 0.9591041750E+01 | -0.4526397090E+00 |
| 0.3802455710E+01 | -0.3221641360E+00 |
| 0.1489185420E+01 | -0.1298841970E-01 |
| 0.5748765300E+00 | 0.2013547140E+00  |
| 0.2149473200E+00 | 0.1276991250E+00  |
| 0.7720965000E-01 | 0.1413546650E-01  |
| S 1 1.000        |                   |
| 0.5748765300E+00 | 1.0               |
| S 1 1.000        |                   |
| 0.2149473200E+00 | 1.0               |
| S 1 1.000        |                   |
| 0.7720965000E-01 | 1.0               |
| S 1 1.0          |                   |
| 0.2773391198E-01 | 1.0000000000      |
| P 12 1.000       |                   |
| 0.2221336090E+05 | 0.2313862990E-01  |
| 0.3331736980E+04 | 0.4264913270E-01  |
| 0.7579013460E+03 | 0.7465885120E-01  |
| 0.2145437190E+03 | 0.1202411540E+00  |
| 0.6992488940E+02 | 0.1835117630E+00  |
| 0.2508613490E+02 | 0.2470680430E+00  |
| 0.9591041750E+01 | 0.3071421870E+00  |
| 0.3802455710E+01 | 0.3137270600E+00  |
| 0.1489185420E+01 | 0.2672633980E+00  |
| 0.5748765300E+00 | 0.1475658550E+00  |
| 0.2149473200E+00 | 0.4758557640E-01  |
| 0.7720965000E-01 | 0.7279645930E-02  |
| P 1 1.000        |                   |
| 0.5748765300E+00 |                   |
| P 1 1.000        |                   |
| 0.2149473200E+00 |                   |
| P 1 1.000        |                   |
| 0.7720965000E-01 |                   |
| P 1 1.0          |                   |
| 0.2773391198E-01 | 1.0000000000      |
| D 1 1.00         |                   |
| 0.1489185420E+01 | 1.0               |
| D 1 1.00         |                   |
| 0.5748765300E+00 | 1.0               |
| D 1 1.00         |                   |
| 0.2149473200E+00 | 1.0               |

```

D 1 1.00
0.7720965000E-01 1.0
D 1 1.0
0.2773391198E-01 1.0000000000
****
-H 0
S 6 1.0
0.7784080190E+02 0.3765677010E-01
0.1153441740E+02 0.7036322570E-01
0.2613858140E+01 0.1131455390E+00
0.7321663300E+00 0.1393935110E+00
0.2283819000E+00 0.1091635820E+00
0.7450697000E-01 0.3585699350E-01
S 1 1.0
0.7321663300E+00 1.0
S 1 1.0
0.2283819000E+00 1.0
S 1 1.0
0.7450697000E-01 1.0
S 1 1.0
0.2430704263e-01 1.000000
P 1 1.0
0.2613858140E+01 1.0
P 1 1.0
0.7321663300E+00 1.0
P 1 1.0
0.2283819000E+00 1.0
P 1 1.0
0.7450697000E-01 1.0
P 1 1.0
0.2430704263e-01 1.000000
D 1 1.0
0.7321663300E+00 1.0
D 1 1.0
0.2283819000E+00 1.0
D 1 1.0
0.7450697000E-01 1.0
D 1 1.0
0.2430704263e-01 1.000000
****
-O 0
S 13 1.0
0.6120995220E+05 0.2484510850E+00
0.9191660630E+04 0.4640692010E+00
0.2094692730E+04 0.8000280060E+00
0.5935495900E+03 0.1288259230E+01

```

|                  |                   |
|------------------|-------------------|
| 0.1936468550E+03 | 0.1912301250E+01  |
| 0.6977937380E+02 | 0.2484317540E+01  |
| 0.2693975300E+02 | 0.2565928310E+01  |
| 0.1093418610E+02 | 0.1710267850E+01  |
| 0.4565711210E+01 | 0.4862767820E+00  |
| 0.1884057180E+01 | 0.2128629570E-01  |
| 0.7553058400E+00 | 0.3876386950E-03  |
| 0.2915527400E+00 | -0.1273179470E-03 |
| 0.1049174000E+00 | 0.1805300580E-04  |
| S 13 1.0         |                   |
| 0.6120995220E+05 | -0.5837699430E-01 |
| 0.9191660630E+04 | -0.1091869670E+00 |
| 0.2094692730E+04 | -0.1884255660E+00 |
| 0.5935495900E+03 | -0.3060803760E+00 |
| 0.1936468550E+03 | -0.4627975500E+00 |
| 0.6977937380E+02 | -0.6352657150E+00 |
| 0.2693975300E+02 | -0.7423516650E+00 |
| 0.1093418610E+02 | -0.6508699470E+00 |
| 0.4565711210E+01 | -0.2850338670E+00 |
| 0.1884057180E+01 | 0.1945857910E+00  |
| 0.7553058400E+00 | 0.3001787390E+00  |
| 0.2915527400E+00 | 0.1205146690E+00  |
| 0.1049174000E+00 | 0.7304580300E-02  |
| S 1 1.0          |                   |
| 0.7553058400E+00 | 1.0               |
| S 1 1.0          |                   |
| 0.2915527400E+00 | 1.0               |
| S 1 1.0          |                   |
| 0.1049174000E+00 | 1.0               |
| S 1 1.00         |                   |
| 0.3775529883E-01 | 1.000             |
| P 13 1.0         |                   |
| 0.6120995220E+05 | 0.4803085360E-01  |
| 0.9191660630E+04 | 0.7673145870E-01  |
| 0.2094692730E+04 | 0.1493385660E+00  |
| 0.5935495900E+03 | 0.2241829500E+00  |
| 0.1936468550E+03 | 0.3683805400E+00  |
| 0.6977937380E+02 | 0.5002376060E+00  |
| 0.2693975300E+02 | 0.6764937310E+00  |
| 0.1093418610E+02 | 0.7390674950E+00  |
| 0.4565711210E+01 | 0.7096321280E+00  |
| 0.1884057180E+01 | 0.4954630190E+00  |
| 0.7553058400E+00 | 0.2131075530E+00  |
| 0.2915527400E+00 | 0.5731713790E-01  |
| 0.1049174000E+00 | 0.6280915410E-02  |
| P 1 1.0          |                   |

```

0.7553058400E+00  1.0
P 1 1.0
0.2915527400E+00  1.0
P 1 1.0
0.1049174000E+00  1.0
P 1 1.00
0.3775529883E-01  1.000
D 1 1.0
0.1884057180E+01  1.0
D 1 1.0
0.7553058400E+00  1.0
D 1 1.0
0.2915527400E+00  1.0
D 1 1.0
0.1049174000E+00  1.0
D 1 1.00
0.3775529883E-01  1.000
****
-Si 0
S 16  1.0
0.3438174730E+06  0.4335119370E+00
0.5158121200E+05  0.8101863750E+00
0.1175739300E+05  0.1399303150E+01
0.3333446730E+04  0.2273563020E+01
0.1087941220E+04  0.3474101770E+01
0.3926959610E+03  0.4876005680E+01
0.1528140280E+03  0.5907024760E+01
0.6299862360E+02  0.5483801360E+01
0.2705625860E+02  0.3053203760E+01
0.1187042140E+02  0.6325288240E+00
0.5228684970E+01  0.1091370750E-01
0.2311042430E+01  0.2080661420E-02
0.1004384400E+01  -0.5817685680E-03
0.3707172100E+00  0.1243160600E-03
0.1452366700E+00  -0.2821156560E-04
0.5395580000E-01  0.3727024240E-05
S 16  1.0
0.3438174730E+06  -0.1149757090E+00
0.5158121200E+05  -0.2147824380E+00
0.1175739300E+05  -0.3718636650E+00
0.3333446730E+04  -0.6058961840E+00
0.1087941220E+04  -0.9391423170E+00
0.3926959610E+03  -0.1357532860E+01
0.1528140280E+03  -0.1782220430E+01
0.6299862360E+02  -0.1949307030E+01
0.2705625860E+02  -0.1531144390E+01

```

0.1187042140E+02 -0.3341162700E+00  
0.5228684970E+01 0.7106919810E+00  
0.2311042430E+01 0.7586346350E+00  
0.1004384400E+01 0.2091817800E+00  
0.3707172100E+00 0.4707350490E-02  
0.1452366700E+00 -0.4032458020E-04  
0.5395580000E-01 -0.7218238120E-05  
S 16 1.0  
0.3438174730E+06 0.3303619230E-01  
0.5158121200E+05 0.6179473310E-01  
0.1175739300E+05 0.1067996640E+00  
0.3333446730E+04 0.1745046510E+00  
0.1087941220E+04 0.2698886300E+00  
0.3926959610E+03 0.3926665170E+00  
0.1528140280E+03 0.5159769810E+00  
0.6299862360E+02 0.5764094520E+00  
0.2705625860E+02 0.4607197300E+00  
0.1187042140E+02 0.1135897930E+00  
0.5228684970E+01 -0.2660797790E+00  
0.2311042430E+01 -0.3651649180E+00  
0.1004384400E+01 -0.1725564020E+00  
0.3707172100E+00 0.1305977720E+00  
0.1452366700E+00 0.1176289060E+00  
0.5395580000E-01 0.1135787650E-01  
S 1 1.0  
0.3707172100E+00 1.00  
S 1 1.0  
0.1452366700E+00 1.00  
S 1 1.0  
0.5395580000E-01 1.00  
S 1 1.00  
0.2004471979E-01 1.0000  
P 16 1.0  
0.3438174730E+06 0.1887824980E+00  
0.5158121200E+05 0.3404033260E+00  
0.1175739300E+05 0.6051988330E+00  
0.3333446730E+04 0.9718232010E+00  
0.1087941220E+04 0.1539229250E+01  
0.3926959610E+03 0.2258981700E+01  
0.1528140280E+03 0.3147131280E+01  
0.6299862360E+02 0.3939670430E+01  
0.2705625860E+02 0.4289582210E+01  
0.1187042140E+02 0.3747635650E+01  
0.5228684970E+01 0.2240487620E+01  
0.2311042430E+01 0.8457737100E+00  
0.1004384400E+01 0.1495054610E+00

0.3707172100E+00      0.4364831050E-02  
 0.1452366700E+00    -0.1489383380E-03  
 0.5395580000E-01      0.1058553800E-04  
 P 16 1.0  
 0.3438174730E+06    -0.4141514980E-01  
 0.5158121200E+05    -0.8300210090E-01  
 0.1175739300E+05    -0.1366750530E+00  
 0.3333446730E+04    -0.2320488130E+00  
 0.1087941220E+04    -0.3530394970E+00  
 0.3926959610E+03    -0.5349555090E+00  
 0.1528140280E+03    -0.7298411540E+00  
 0.6299862360E+02    -0.9378584820E+00  
 0.2705625860E+02    -0.1018386130E+01  
 0.1187042140E+02    -0.9270077190E+00  
 0.5228684970E+01    -0.5664204920E+00  
 0.2311042430E+01    -0.2281783590E+00  
 0.1004384400E+01      0.1029359510E-01  
 0.3707172100E+00      0.7575945350E-01  
 0.1452366700E+00      0.3706140350E-01  
 0.5395580000E-01      0.6700686080E-02  
 P 1 1.0  
 0.3707172100E+00    1.0  
 P 1 1.0  
 0.1452366700E+00    1.0  
 P 1 1.0  
 0.5395580000E-01    1.0  
 P 1 1.00  
 0.2004471979E-01    1.0000  
 D 1 1.0  
 0.1004384400E+01    1.0  
 D 1 1.0  
 0.3707172100E+00    1.0  
 D 1 1.0  
 0.1452366700E+00    1.0  
 D 1 1.0  
 0.5395580000E-01    1.0  
 D 1 1.00  
 0.2004471979E-01    1.0000  
 \*\*\*\*\*  
 -N 0  
 S 13 1.0  
 0.5175062370E+05      0.1919775470E+00  
 0.7806165340E+04      0.3574792350E+00  
 0.1785836240E+04      0.6155844300E+00  
 0.5074092930E+03      0.9926141120E+00  
 0.1658509660E+03      0.1482142820E+01



|                  |                   |
|------------------|-------------------|
| 0.5984476610E+02 | 0.1955456810E+01  |
| 0.2313469890E+02 | 0.2084929520E+01  |
| 0.9418458910E+01 | 0.1512370950E+01  |
| 0.3941794820E+01 | 0.5193947420E+00  |
| 0.1622742640E+01 | 0.3717803360E-01  |
| 0.6526657200E+00 | -0.3809234080E-03 |
| 0.2543715500E+00 | 0.3073830710E-04  |
| 0.9411174000E-01 | -0.1145079080E-05 |
| S 13 1.0         |                   |
| 0.5175062370E+05 | -0.4460788650E-01 |
| 0.7806165340E+04 | -0.8300555230E-01 |
| 0.1785836240E+04 | -0.1434592140E+00 |
| 0.5074092930E+03 | -0.2322378010E+00 |
| 0.1658509660E+03 | -0.3540798740E+00 |
| 0.5984476610E+02 | -0.4868621960E+00 |
| 0.2313469890E+02 | -0.5838257510E+00 |
| 0.9418458910E+01 | -0.5302733550E+00 |
| 0.3941794820E+01 | -0.2930227470E+00 |
| 0.1622742640E+01 | 0.1017905400E+00  |
| 0.6526657200E+00 | 0.2510234710E+00  |
| 0.2543715500E+00 | 0.1235542910E+00  |
| 0.9411174000E-01 | 0.1100946650E-01  |
| S 1 1.0          |                   |
| 0.6526657200E+00 | 1.0               |
| S 1 1.0          |                   |
| 0.2543715500E+00 | 1.0               |
| S 1 1.0          |                   |
| 0.9411174000E-01 | 1.0               |
| S 1 1.00         |                   |
| 0.3481922253E-01 | 1.00              |
| P 13 1.0         |                   |
| 0.5175062370E+05 | 0.3139116780E-01  |
| 0.7806165340E+04 | 0.4794149630E-01  |
| 0.1785836240E+04 | 0.9624701750E-01  |
| 0.5074092930E+03 | 0.1412402870E+00  |
| 0.1658509660E+03 | 0.2364183380E+00  |
| 0.5984476610E+02 | 0.3189381040E+00  |
| 0.2313469890E+02 | 0.4349960350E+00  |
| 0.9418458910E+01 | 0.4842569670E+00  |
| 0.3941794820E+01 | 0.4789960860E+00  |
| 0.1622742640E+01 | 0.3663209510E+00  |
| 0.6526657200E+00 | 0.1751237860E+00  |
| 0.2543715500E+00 | 0.5187149180E-01  |
| 0.9411174000E-01 | 0.7247309710E-02  |
| P 1 1.0          |                   |
| 0.6526657200E+00 | 1.0               |

```

P 1 1.0
  0.2543715500E+00  1.0
P 1 1.0
  0.94111174000E-01  1.0
P 1 1.00
  0.3481922253E-01  1.00
D 1 1.0
  0.1622742640E+01  1.0
D 1 1.0
  0.6526657200E+00  1.0
D 1 1.0
  0.2543715500E+00  1.0
D 1 1.0
  0.94111174000E-01  1.0
D 1 1.00
  0.3481922253E-01  1.00
****
-Na 0
S 16  1.0
  0.2514549910E+06  0.2745909340E+00
  0.3800758270E+05  0.5106827640E+00
  0.8715688450E+04  0.8799275060E+00
  0.2483133950E+04  0.1429422300E+01
  0.8135133250E+03  0.2193187980E+01
  0.2945696940E+03  0.3119941430E+01
  0.1149592610E+03  0.3904449050E+01
  0.4746043120E+02  0.3916234120E+01
  0.2041045840E+02  0.2576144260E+01
  0.9026008680E+01  0.7644203210E+00
  0.3998081980E+01  0.4535571520E-01
  0.1734809260E+01  0.5917155430E-03
  0.7379976200E+00 -0.2249938550E-03
  0.2969419100E+00  0.4878174190E-04
  0.7115394000E-01 -0.5418108810E-05
  0.2685790000E-01  0.1024029380E-05
S 16  1.0
  0.2514549910E+06 -0.6752737190E-01
  0.3800758270E+05 -0.1255177030E+00
  0.8715688450E+04 -0.2167577330E+00
  0.2483133950E+04 -0.3527634130E+00
  0.8135133250E+03 -0.5476913090E+00
  0.2945696940E+03 -0.7969802310E+00
  0.1149592610E+03 -0.1063505890E+01
  0.4746043120E+02 -0.1215709730E+01
  0.2041045840E+02 -0.1061364270E+01
  0.9026008680E+01 -0.4524548060E+00

```

|                  |                   |
|------------------|-------------------|
| 0.3998081980E+01 | 0.2891208180E+00  |
| 0.1734809260E+01 | 0.5004634720E+00  |
| 0.7379976200E+00 | 0.2581307850E+00  |
| 0.2969419100E+00 | 0.3076341040E-01  |
| 0.7115394000E-01 | -0.1530594040E-03 |
| 0.2685790000E-01 | 0.3481779060E-04  |
| S 16 1.0         |                   |
| 0.2514549910E+06 | 0.1249687050E-01  |
| 0.3800758270E+05 | 0.2324562550E-01  |
| 0.8715688450E+04 | 0.4010390870E-01  |
| 0.2483133950E+04 | 0.6536929340E-01  |
| 0.8135133250E+03 | 0.1013683360E+00  |
| 0.2945696940E+03 | 0.1480359290E+00  |
| 0.1149592610E+03 | 0.1976652170E+00  |
| 0.4746043120E+02 | 0.2285401320E+00  |
| 0.2041045840E+02 | 0.2018209460E+00  |
| 0.9026008680E+01 | 0.9019295550E-01  |
| 0.3998081980E+01 | -0.6155933610E-01 |
| 0.1734809260E+01 | -0.1207921530E+00 |
| 0.7379976200E+00 | -0.9810404730E-01 |
| 0.2969419100E+00 | -0.1555457760E-01 |
| 0.7115394000E-01 | 0.5285447120E-01  |
| 0.2685790000E-01 | 0.2691995250E-01  |
| S 1 1.0          |                   |
| 0.2969419100E+00 | 1.0               |
| S 1 1.0          |                   |
| 0.7115394000E-01 | 1.0               |
| S 1 1.0          |                   |
| 0.2685790000E-01 | 1.0               |
| S 1 1.0          |                   |
| 0.1013783344E-01 | 1.0               |
| S 1 1.000        |                   |
| 0.1013783344e-01 | 1.00000000000     |
| P 16 1.0         |                   |
| 0.2514549910E+06 | 0.7475524700E-01  |
| 0.3800758270E+05 | 0.1498970700E+00  |
| 0.8715688450E+04 | 0.2454134210E+00  |
| 0.2483133950E+04 | 0.4169011860E+00  |
| 0.8135133250E+03 | 0.6328444070E+00  |
| 0.2945696940E+03 | 0.9630351770E+00  |
| 0.1149592610E+03 | 0.1314378410E+01  |
| 0.4746043120E+02 | 0.1713220100E+01  |
| 0.2041045840E+02 | 0.1886850410E+01  |
| 0.9026008680E+01 | 0.1788343490E+01  |
| 0.3998081980E+01 | 0.1242364900E+01  |
| 0.1734809260E+01 | 0.5739846420E+00  |

```

0.7379976200E+00    0.1705305970E+00
0.2969419100E+00    0.2295712250E-01
0.7115394000E-01    0.2234358930E-03
0.2685790000E-01    -0.1555094750E-04
!P 1 1.0
! 0.7379976200E+00  1.0
P 1 1.0
0.2969419100E+00  1.0
P 1 1.0
0.7115394000E-01  1.0
P 1 1.0
0.2685790000E-01  1.0
P 1 1.000
0.1013783344e-01  1.0000000000
!D 1 1.0
! 0.1734809260E+01  1.0
D 1 1.0
0.7379976200E+00  1.0
D 1 1.0
0.2969419100E+00  1.0
D 1 1.0
0.7115394000E-01  1.0
D 1 1.0
0.2685790000E-01  1.0
D 1 1.000
0.1013783344e-01  1.0000000000
****
-Cl 0
S 17 1.0
0.7648024940E+06    0.4732436690E+00
0.1156452380E+06    0.8803816070E+00
0.2650416860E+05    0.1518922810E+01
0.7546165150E+04    0.2472308980E+01
0.2471893990E+04    0.3813762320E+01
0.8955334270E+03    0.5511242440E+01
0.3502018090E+03    0.7169615360E+01
0.1452812440E+03    0.7760870250E+01
0.6311107360E+02    0.5933825840E+01
0.2842186910E+02    0.2371148900E+01
0.1295952600E+02    0.2768854050E+00
0.5938778000E+01    -0.6086912280E-04
0.2723597280E+01    0.4511226240E-03
0.1217237400E+01    -0.7419490690E-04
0.5380555600E+00    0.1244793470E-04
0.2218100500E+00    -0.1836734320E-05
0.8549084000E-01    0.1926362200E-06

```

|                  |                   |
|------------------|-------------------|
| S 17 1.0         |                   |
| 0.7648024940E+06 | -0.1318242380E+00 |
| 0.1156452380E+06 | -0.2451372520E+00 |
| 0.2650416860E+05 | -0.4236909770E+00 |
| 0.7546165150E+04 | -0.6907905800E+00 |
| 0.2471893990E+04 | -0.1076075890E+01 |
| 0.8955334270E+03 | -0.1585594950E+01 |
| 0.3502018090E+03 | -0.2176949650E+01 |
| 0.1452812440E+03 | -0.2635079970E+01 |
| 0.6311107360E+02 | -0.2563322680E+01 |
| 0.2842186910E+02 | -0.1483648060E+01 |
| 0.1295952600E+02 | 0.2412830390E+00  |
| 0.5938778000E+01 | 0.1261105160E+01  |
| 0.2723597280E+01 | 0.7743913000E+00  |
| 0.1217237400E+01 | 0.1031951090E+00  |
| 0.5380555600E+00 | -0.1080473290E-02 |
| 0.2218100500E+00 | 0.2954365990E-03  |
| 0.8549084000E-01 | -0.3286570230E-04 |
| S 17 1.0         |                   |
| 0.7648024940E+06 | 0.4305394610E-01  |
| 0.1156452380E+06 | 0.8017024150E-01  |
| 0.2650416860E+05 | 0.1383085710E+00  |
| 0.7546165150E+04 | 0.2261389170E+00  |
| 0.2471893990E+04 | 0.3513898800E+00  |
| 0.8955334270E+03 | 0.5209143100E+00  |
| 0.3502018090E+03 | 0.7149733910E+00  |
| 0.1452812440E+03 | 0.8808754430E+00  |
| 0.6311107360E+02 | 0.8687494720E+00  |
| 0.2842186910E+02 | 0.5385814620E+00  |
| 0.1295952600E+02 | -0.1040518410E+00 |
| 0.5938778000E+01 | -0.5993299400E+00 |
| 0.2723597280E+01 | -0.5687659480E+00 |
| 0.1217237400E+01 | -0.1726383870E-01 |
| 0.5380555600E+00 | 0.2717702610E+00  |
| 0.2218100500E+00 | 0.1215359850E+00  |
| 0.8549084000E-01 | 0.7456514150E-02  |
| S 1 1.00         |                   |
| 0.5380555600E+00 | 1.00000           |
| S 1 1.00         |                   |
| 0.2218100500E+00 | 1.00000           |
| S 1 1.00         |                   |
| 0.8549084000E-01 | 1.00000           |
| S 1 1.00         |                   |
| 0.3295019195E-01 | 1.00000           |
| P 17 1.0         |                   |
| 0.7648024940E+06 | 0.2593952270D+00  |

|                  |                   |
|------------------|-------------------|
| 0.1156452380E+06 | 0.5157334000D+00  |
| 0.2650416860E+05 | 0.8489733730D+00  |
| 0.7546165150E+04 | 0.1438472400D+01  |
| 0.2471893990E+04 | 0.2193025490D+01  |
| 0.8955334270E+03 | 0.3353237010D+01  |
| 0.3502018090E+03 | 0.4680446020D+01  |
| 0.1452812440E+03 | 0.6270699110D+01  |
| 0.6311107360E+02 | 0.7287465380D+01  |
| 0.2842186910E+02 | 0.7367579690D+01  |
| 0.1295952600E+02 | 0.5613192300D+01  |
| 0.5938778000E+01 | 0.2889937070D+01  |
| 0.2723597280E+01 | 0.8063782520D+00  |
| 0.1217237400E+01 | 0.7444713490D-01  |
| 0.5380555600E+00 | -0.6145532010D-04 |
| 0.2218100500E+00 | 0.9671962940D-04  |
| 0.8549084000E-01 | -0.8265756710D-05 |
| P 17 1.0         |                   |
| 0.7648024940E+06 | -0.7688745320D-01 |
| 0.1156452380E+06 | -0.1437854490D+00 |
| 0.2650416860E+05 | -0.2474340600D+00 |
| 0.7546165150E+04 | -0.4059995640D+00 |
| 0.2471893990E+04 | -0.6340056560D+00 |
| 0.8955334270E+03 | -0.9533552000D+00 |
| 0.3502018090E+03 | -0.1352842270D+01 |
| 0.1452812440E+03 | -0.1802719810D+01 |
| 0.6311107360E+02 | -0.2142763550D+01 |
| 0.2842186910E+02 | -0.2197555690D+01 |
| 0.1295952600E+02 | -0.1761529840D+01 |
| 0.5938778000E+01 | -0.9427501270D+00 |
| 0.2723597280E+01 | -0.2057292640D+00 |
| 0.1217237400E+01 | 0.1762314060D+00  |
| 0.5380555600E+00 | 0.1606983270D+00  |
| 0.2218100500E+00 | 0.5386056450D-01  |
| 0.8549084000E-01 | 0.6083841020D-02  |
| P 1 1.000        |                   |
| 0.5380555600E+00 | 1.000             |
| P 1 1.000        |                   |
| 0.2218100500E+00 | 1.000             |
| P 1 1.000        |                   |
| 0.8549084000E-01 | 1.000             |
| P 1 1.000        |                   |
| 0.3295019195e-01 | 1.000             |
| D 1 1.00         |                   |
| 0.1217237400E+01 | 1.000             |
| D 1 1.000        |                   |
| 0.5380555600E+00 | 1.000             |

```

D 1 1.000
0.2218100500E+00    1.000
D 1 1.000
0.8549084000E-01    1.000
D 1 1.000
0.3295019195e-01 1.000
****
-Li  0
S 15 1.0000
5.42944394e+03    -0.5875818297E-01
1.37916632e+03    -0.6001848738E-01
5.24950092e+02    -0.1002233904
1.79461008e+02    -0.1789313215
6.25244982e+01    -0.2786274379
2.33568013e+01    -0.3946603663
9.29375078e+00    -0.4880090038
3.79280557e+00    -0.5085738904
1.65598231e+00    -0.2880409710
1.10428577e+00    -0.1157827695
6.17106999e-01    -0.1026195663
2.98891332e-01    -0.1942268562E-01
9.55240908e-02    -0.1977155092E-03
3.91891205e-02    0.1988484732E-04
1.76690597e-02    -0.2681193753E-05
S 15 1.00000
5.42944394e+03    -0.1067947541E-01
1.37916632e+03    -0.1007550449E-01
5.24950092e+02    -0.1901058733E-01
1.79461008e+02    -0.3027494317E-01
6.25244982e+01    -0.5299430541E-01
2.33568013e+01    -0.6706513630E-01
9.29375078e+00    -0.1017958322
3.79280557e+00    -0.8450343409E-01
1.65598231e+00    -0.1351592616
1.10428577e+00    0.4343848450E-01
6.17106999e-01    -0.6348861576E-01
2.98891332e-01    -0.2721945266E-01
9.55240908e-02    0.5795435979E-01
3.91891205e-02    0.3351818435E-01
1.76690597e-02    0.5024015362E-02
S 1 1.000
2.98891332e-01    1.000
S 1 1.000
9.55240908e-02    1.000
S 1 1.000
3.91891205e-02    1.000

```

```

S 1 1.000
1.76690597e-02 1.000
P 1 1.000
1.10428577e+00 1.000
P 1 1.000
6.17106999e-01 1.000
P 1 1.000
2.98891332e-01 1.000
P 1 1.000
9.55240908e-02 1.000
P 1 1.000
3.91891205e-02 1.000
P 1 1.000
1.76690597e-02 1.000
D 1 1.000
1.10428577e+00 1.000
D 1 1.000
6.17106999e-01 1.000
D 1 1.000
2.98891332e-01 1.000
D 1 1.000
9.55240908e-02 1.000
D 1 1.000
3.91891205e-02 1.000
****
-Be 0
S 10 1.0000
0.5859507080E+04 0.1356747580E+00
0.8776208410E+03 0.2539566910E+00
0.1991723400E+03 0.4342912580E+00
0.5626307070E+02 0.6750290760E+00
0.1826961590E+02 0.8917820500E+00
0.6473667150E+01 0.9024922970E+00
0.2445688700E+01 0.5799824540E+00
0.9341739200E+00 0.1536025430E+00
0.1817039200E+00 0.2107594360E-02
0.5906470000E-01 -0.2247270500E-03
S 10 1.0000
0.5859507080E+04 -0.2796931200E-01
0.8776208410E+03 -0.5170663340E-01
0.1991723400E+03 -0.9062186920E-01
0.5626307070E+02 -0.1392359400E+00
0.1826961590E+02 -0.1988883660E+00
0.6473667150E+01 -0.2142827010E+00
0.2445688700E+01 -0.1942901520E+00
0.9341739200E+00 -0.6634498410E-01

```



```

0.1817039200E+00      0.1091302070E+00
0.5906470000E-01      0.4818109410E-01
S 1 1.00
0.9341739200E+00  1.00
S 1 1.00
0.1817039200E+00  1.00
S 1 1.00
0.5906470000E-01  1.00
S 1 1.00
0.1919957911E-01  1.00
P 1 1.000
0.2445688700E+01  1.000
P 1 1.00
0.9341739200E+00  1.00
P 1 1.00
0.1817039200E+00  1.00
P 1 1.00
0.5906470000E-01  1.00
P 1 1.00
0.1919957911E-01  1.00
D 1 1.00
0.9341739200E+00  1.00
D 1 1.00
0.1817039200E+00  1.00
D 1 1.00
0.5906470000E-01  1.00
D 1 1.00
0.1919957911E-01  1.00
****
-F 0
S 14 1.00
0.1231742220E+06      0.2355763350E+00
0.1865493160E+05      0.4376225000E+00
0.4284660370E+04      0.7524712120E+00
0.1223150920E+04      0.1216638020E+01
0.4016733760E+03      0.1845316540E+01
0.1457852270E+03      0.2551384850E+01
0.5694551760E+02      0.3004077050E+01
0.2349311190E+02      0.2682876730E+01
0.1003418550E+02      0.1405497250E+01
0.4343769680E+01      0.2609771830E+00
0.1868203030E+01      0.2555561480E-02
0.7806879100E+00      0.7546130340E-03
0.3149846100E+00      -0.1646029690E-03
0.1181861600E+00      0.2082887950E-04
S 14 1.000

```

|                  |                   |
|------------------|-------------------|
| 0.1231742220E+06 | -0.5583942250E-01 |
| 0.1865493160E+05 | -0.1035858050E+00 |
| 0.4284660370E+04 | -0.1788144750E+00 |
| 0.1223150920E+04 | -0.2894265580E+00 |
| 0.4016733760E+03 | -0.4466115800E+00 |
| 0.1457852270E+03 | -0.6343658820E+00 |
| 0.5694551760E+02 | -0.8145208580E+00 |
| 0.2349311190E+02 | -0.8538368980E+00 |
| 0.1003418550E+02 | -0.6447789780E+00 |
| 0.4343769680E+01 | -0.1142431720E+00 |
| 0.1868203030E+01 | 0.3167190590E+00  |
| 0.7806879100E+00 | 0.3041863400E+00  |
| 0.3149846100E+00 | 0.1005780670E+00  |
| 0.1181861600E+00 | 0.4817488440E-02  |
| S 1 1.000        |                   |
| 0.7806879100E+00 | 1.00              |
| S 1 1.000        |                   |
| 0.3149846100E+00 | 1.00              |
| S 1 1.000        |                   |
| 0.1181861600E+00 | 1.00              |
| S 1 1.000        |                   |
| 0.4434492344E-01 | 1.00              |
| P 14 1.000       |                   |
| 0.1231742220E+06 | 0.4900854750E-01  |
| 0.1865493160E+05 | 0.9059901630E-01  |
| 0.4284660370E+04 | 0.1569389330E+00  |
| 0.1223150920E+04 | 0.2549422150E+00  |
| 0.4016733760E+03 | 0.3969983700E+00  |
| 0.1457852270E+03 | 0.5817501900E+00  |
| 0.5694551760E+02 | 0.7854593500E+00  |
| 0.2349311190E+02 | 0.9713952850E+00  |
| 0.1003418550E+02 | 0.1017485400E+01  |
| 0.4343769680E+01 | 0.8881348760E+00  |
| 0.1868203030E+01 | 0.5325776020E+00  |
| 0.7806879100E+00 | 0.2097448310E+00  |
| 0.3149846100E+00 | 0.5358788830E-01  |
| 0.1181861600E+00 | 0.5596492130E-02  |
| P 1 1.000        |                   |
| 0.7806879100E+00 | 1.00              |
| P 1 1.000        |                   |
| 0.3149846100E+00 | 1.00              |
| P 1 1.000        |                   |
| 0.1181861600E+00 | 1.00              |
| P 1 1.000        |                   |
| 0.4434492344E-01 | 1.00              |
| D 1 1.00         |                   |

```

0.1868203030E+01  1.000
D 1 1.000
0.7806879100E+00  1.00
D 1 1.000
0.3149846100E+00  1.00
D 1 1.000
0.1181861600E+00  1.00
D 1 1.000
0.4434492344E-01  1.00
****
-B 0
S 12 1.000
0.1715154660E+05      0.1419218390E+00
0.2539347650E+04      0.2671949380E+00
0.5729100010E+03      0.4615325680E+00
0.1610864570E+03      0.7384083450E+00
0.5218849780E+02      0.1065015950E+01
0.1861757420E+02      0.1279087950E+01
0.7055424410E+01      0.1147442970E+01
0.2776149160E+01      0.5697916130E+00
0.1086598520E+01      0.8508472600E-01
0.4101434300E+00      -0.9886062860E-03
0.1518772300E+00      0.3248798750E-03
0.5476114000E-01      -0.4304233470E-04
S 12 1.000
0.1715154660E+05      -0.3117877050E-01
0.2539347650E+04      -0.5904321360E-01
0.5729100010E+03      -0.1015094520E+00
0.1610864570E+03      -0.1655624640E+00
0.5218849780E+02      -0.2418845040E+00
0.1861757420E+02      -0.3163422910E+00
0.7055424410E+01      -0.3269134950E+00
0.2776149160E+01      -0.2400824900E+00
0.1086598520E+01      -0.4173518940E-01
0.4101434300E+00      0.1397861410E+00
0.1518772300E+00      0.1050968580E+00
0.5476114000E-01      0.1274604460E-01
S 1 1.000
0.4101434300E+00  1.000
S 1 1.000
0.1518772300E+00  1.000
S 1 1.000
0.5476114000E-01  1.000
S 1 1.000
0.1974477974E-01  1.000
P 12 1.000

```

|                  |                   |
|------------------|-------------------|
| 0.1715154660E+05 | 0.1404435530E-01  |
| 0.2539347650E+04 | 0.1991509840E-01  |
| 0.5729100010E+03 | 0.4282434150E-01  |
| 0.1610864570E+03 | 0.6012095370E-01  |
| 0.5218849780E+02 | 0.1025729050E+00  |
| 0.1861757420E+02 | 0.1270304500E+00  |
| 0.7055424410E+01 | 0.1691154860E+00  |
| 0.2776149160E+01 | 0.1651506840E+00  |
| 0.1086598520E+01 | 0.1490724420E+00  |
| 0.4101434300E+00 | 0.9284969190E-01  |
| 0.1518772300E+00 | 0.3277756630E-01  |
| 0.5476114000E-01 | 0.5491094980E-02  |
| P 1 1.000        |                   |
| 0.4101434300E+00 | 1.000             |
| P 1 1.000        |                   |
| 0.1518772300E+00 | 1.000             |
| P 1 1.000        |                   |
| 0.5476114000E-01 | 1.000             |
| P 1 1.000        |                   |
| 0.1974477974E-01 | 1.000             |
| D 1 1.00         |                   |
| 0.1086598520E+01 | 1.000             |
| D 1 1.000        |                   |
| 0.4101434300E+00 | 1.000             |
| D 1 1.000        |                   |
| 0.1518772300E+00 | 1.000             |
| D 1 1.000        |                   |
| 0.5476114000E-01 | 1.000             |
| D 1 1.000        |                   |
| 0.1974477974E-01 | 1.000             |
| ****             |                   |
| -Mg 0            |                   |
| S 16 1.00        |                   |
| 0.3153321870E+06 | 0.3056554300E+00  |
| 0.4765445370E+05 | 0.5686534590E+00  |
| 0.1092476220E+05 | 0.9797500480E+00  |
| 0.3114792500E+04 | 0.1590029240E+01  |
| 0.1022187830E+04 | 0.2439436660E+01  |
| 0.3709118900E+03 | 0.3480275970E+01  |
| 0.1451174260E+03 | 0.4396579360E+01  |
| 0.6009075460E+02 | 0.4499103510E+01  |
| 0.2595462450E+02 | 0.3084056080E+01  |
| 0.1155775900E+02 | 0.9979481430E+00  |
| 0.5171717200E+01 | 0.7380006550E-01  |
| 0.2280794010E+01 | 0.4096687060E-03  |
| 0.1001940640E+01 | -0.1936928560E-03 |

|                  |                   |
|------------------|-------------------|
| 0.4254800000E+00 | 0.5247771960E-04  |
| 0.1182550200E+00 | -0.6743999680E-05 |
| 0.4268006000E-01 | 0.1089693040E-05  |
| S 16 1.00        |                   |
| 0.3153321870E+06 | -0.7734719840E-01 |
| 0.4765445370E+05 | -0.1438318890E+00 |
| 0.1092476220E+05 | -0.2483266640E+00 |
| 0.3114792500E+04 | -0.4037641680E+00 |
| 0.1022187830E+04 | -0.6264518010E+00 |
| 0.3709118900E+03 | -0.9135558670E+00 |
| 0.1451174260E+03 | -0.1226942060E+01 |
| 0.6009075460E+02 | -0.1423448410E+01 |
| 0.2595462450E+02 | -0.1278406030E+01 |
| 0.1155775900E+02 | -0.6001402410E+00 |
| 0.5171717200E+01 | 0.2857192830E+00  |
| 0.2280794010E+01 | 0.6067798050E+00  |
| 0.1001940640E+01 | 0.3334560380E+00  |
| 0.4254800000E+00 | 0.4578459520E-01  |
| 0.1182550200E+00 | -0.3243905570E-04 |
| 0.4268006000E-01 | 0.2247599340E-04  |
| S 16 1.00        |                   |
| 0.3153321870E+06 | 0.1759757530E-01  |
| 0.4765445370E+05 | 0.3278208410E-01  |
| 0.1092476220E+05 | 0.5645678260E-01  |
| 0.3114792500E+04 | 0.9212899440E-01  |
| 0.1022187830E+04 | 0.1424040470E+00  |
| 0.3709118900E+03 | 0.2091277870E+00  |
| 0.1451174260E+03 | 0.2799712870E+00  |
| 0.6009075460E+02 | 0.3306215770E+00  |
| 0.2595462450E+02 | 0.2982511300E+00  |
| 0.1155775900E+02 | 0.1501677560E+00  |
| 0.5171717200E+01 | -0.7865217670E-01 |
| 0.2280794010E+01 | -0.1822319050E+00 |
| 0.1001940640E+01 | -0.1592505240E+00 |
| 0.4254800000E+00 | -0.2283353620E-01 |
| 0.1182550200E+00 | 0.9048542010E-01  |
| 0.4268006000E-01 | 0.3396371100E-01  |
| S 1 1.000        |                   |
| 0.4254800000E+00 | 1.000             |
| S 1 1.000        |                   |
| 0.1182550200E+00 | 1.000             |
| S 1 1.000        |                   |
| 0.4268006000E-01 | 1.000             |
| S 1 1.00         |                   |
| 0.1540389170E-01 | 1.000             |
| P 16 1.000       |                   |

|                  |                   |
|------------------|-------------------|
| 0.3153321870E+06 | 0.9712614360E-01  |
| 0.4765445370E+05 | 0.1942569660E+00  |
| 0.1092476220E+05 | 0.3186309670E+00  |
| 0.3114792500E+04 | 0.5398099040E+00  |
| 0.1022187830E+04 | 0.8194347350E+00  |
| 0.3709118900E+03 | 0.1246844620E+01  |
| 0.1451174260E+03 | 0.1710414370E+01  |
| 0.6009075460E+02 | 0.2243742190E+01  |
| 0.2595462450E+02 | 0.2504071910E+01  |
| 0.1155775900E+02 | 0.2410974990E+01  |
| 0.5171717200E+01 | 0.1721927720E+01  |
| 0.2280794010E+01 | 0.8233781440E+00  |
| 0.1001940640E+01 | 0.2432462160E+00  |
| 0.4254800000E+00 | 0.3242440120E-01  |
| 0.1182550200E+00 | 0.3278498780E-03  |
| 0.4268006000E-01 | -0.1602123180E-04 |
| P 1 1.000        |                   |
| 0.4254800000E+00 | 1.000             |
| P 1 1.000        |                   |
| 0.1182550200E+00 | 1.000             |
| P 1 1.000        |                   |
| 0.4268006000E-01 | 1.000             |
| P 1 1.00         |                   |
| 0.1540389170E-01 | 1.000             |
| D 1 1.000        |                   |
| 0.1001940640E+01 | 1.0000            |
| D 1 1.000        |                   |
| 0.4254800000E+00 | 1.000             |
| D 1 1.000        |                   |
| 0.1182550200E+00 | 1.000             |
| D 1 1.000        |                   |
| 0.4268006000E-01 | 1.000             |
| D 1 1.00         |                   |
| 0.1540389170E-01 | 1.000             |
| ****             |                   |
| -Ne 0            |                   |
| S 14 1.000       |                   |
| 0.1570064170E+06 | 0.2736595150E+00  |
| 0.2357202230E+05 | 0.5107683190E+00  |
| 0.5384378010E+04 | 0.8802155190E+00  |
| 0.1530177090E+04 | 0.1426612960E+01  |
| 0.5004819910E+03 | 0.2169207470E+01  |
| 0.1809504500E+03 | 0.3009228460E+01  |
| 0.7042869550E+02 | 0.3555665000E+01  |
| 0.2897948950E+02 | 0.3167599420E+01  |
| 0.1236590420E+02 | 0.1639436320E+01  |

|                  |                   |
|------------------|-------------------|
| 0.5350932040E+01 | 0.2944830460E+00  |
| 0.2301383830E+01 | 0.2383620200E-02  |
| 0.9613489300E+00 | 0.8564161010E-03  |
| 0.3866276500E+00 | -0.1829687680E-03 |
| 0.1443326200E+00 | 0.2291426580E-04  |
| S 14 1.000       |                   |
| 0.1570064170E+06 | -0.6521178170E-01 |
| 0.2357202230E+05 | -0.1215738770E+00 |
| 0.5384378010E+04 | -0.2102592370E+00 |
| 0.1530177090E+04 | -0.3413226520E+00 |
| 0.5004819910E+03 | -0.5277200320E+00 |
| 0.1809504500E+03 | -0.7531077920E+00 |
| 0.7042869550E+02 | -0.9705330410E+00 |
| 0.2897948950E+02 | -0.1019814810E+01 |
| 0.1236590420E+02 | -0.7623231240E+00 |
| 0.5350932040E+01 | -0.1156185120E+00 |
| 0.2301383830E+01 | 0.3817250920E+00  |
| 0.9613489300E+00 | 0.3534878530E+00  |
| 0.3866276500E+00 | 0.1150470970E+00  |
| 0.1443326200E+00 | 0.5472659590E-02  |
| S 1 1.000        |                   |
| 0.9613489300E+00 | 1.000             |
| S 1 1.000        |                   |
| 0.3866276500E+00 | 1.000             |
| S 1 1.000        |                   |
| 0.1443326200E+00 | 1.000             |
| S 1 1.000        |                   |
| 0.5388105376E-01 | 1.000             |
| P 14 1.000       |                   |
| 0.1570064170E+06 | 0.6621720420E-01  |
| 0.2357202230E+05 | 0.1199414270E+00  |
| 0.5384378010E+04 | 0.2118454780E+00  |
| 0.1530177090E+04 | 0.3407103530E+00  |
| 0.5004819910E+03 | 0.5367356260E+00  |
| 0.1809504500E+03 | 0.7835796870E+00  |
| 0.7042869550E+02 | 0.1070897510E+01  |
| 0.2897948950E+02 | 0.1318317980E+01  |
| 0.1236590420E+02 | 0.1389828660E+01  |
| 0.5350932040E+01 | 0.1196385250E+01  |
| 0.2301383830E+01 | 0.6990196210E+00  |
| 0.9613489300E+00 | 0.2693808550E+00  |
| 0.3866276500E+00 | 0.6764143130E-01  |
| 0.1443326200E+00 | 0.7068470970E-02  |
| P 1 1.000        |                   |
| 0.9613489300E+00 | 1.000             |
| P 1 1.000        |                   |

0.3866276500E+00 1.000  
 P 1 1.000  
 0.1443326200E+00 1.000  
 P 1 1.000  
 0.5388105376E-01 1.000  
 D 1 1.000  
 0.2301383830E+01 1.000  
 D 1 1.000  
 0.9613489300E+00 1.000  
 D 1 1.000  
 0.3866276500E+00 1.000  
 D 1 1.000  
 0.1443326200E+00 1.000  
 D 1 1.000  
 0.5388105376E-01 1.000  
 \*\*\*\*  
 -He 0  
 S 8 1.000  
 0.1064328140D+04 0.5162833960D-01  
 0.1595241650D+03 0.9661130170D-01  
 0.3611871570D+02 0.1649044020D+00  
 0.1016995400D+02 0.2492102630D+00  
 0.3274689320D+01 0.3028858630D+00  
 0.1125428480D+01 0.2646230430D+00  
 0.3956613500D+00 0.1458877990D+00  
 0.1382103700D+00 0.2884591850D-01  
 S 1 1.000  
 0.1125428480D+01 1.000  
 S 1 1.000  
 0.3956613500D+00 1.000  
 S 1 1.000  
 0.1382103700D+00 1.000  
 S 1 1.000  
 0.4827892938D-01 1.000  
 P 1 1.000  
 0.3274689320D+01 1.0000  
 P 1 1.000  
 0.1125428480D+01 1.000  
 P 1 1.000  
 0.3956613500D+00 1.000  
 P 1 1.000  
 0.1382103700D+00 1.000  
 P 1 1.000  
 0.4827892938D-01 1.000  
 D 1 1.000  
 0.1125428480D+01 1.000



D 1 1.000  
0.3956613500D+00 1.000  
D 1 1.000  
0.1382103700D+00 1.000  
D 1 1.000  
0.4827892938D-01 1.000  
\*\*\*\*
